# Supplementary material for: Serum fibrinogen and cardiovascular events in Chinese patients with type 2 diabetes and stable coronary artery disease: a prospective observational study
Source: PubMed Central journal article supplement — BMJ Open. 2017 Jun 9;7(6):e015041. doi: 10.1136/bmjopen-2016-015041 (PMC5734258; doi:10.1136/bmjopen-2016-015041), 2017-06-09
Supplement: bmjopen-2016-015041.draft_revisions.pdf [file bmjopen-2016-015041.draft_revisions.pdf]

# BMJ Open

## Serum fibrinogen and cardiovascular events in Chinese type 2 diabetic patients with stable coronary artery disease: a prospective observational study

|                                 |                                                                                                                                                                                                                                                                                                                                                                                                                                                                                                                                                                                                                          |
|---------------------------------|--------------------------------------------------------------------------------------------------------------------------------------------------------------------------------------------------------------------------------------------------------------------------------------------------------------------------------------------------------------------------------------------------------------------------------------------------------------------------------------------------------------------------------------------------------------------------------------------------------------------------|
| Journal:                        | <i>BMJ Open</i>                                                                                                                                                                                                                                                                                                                                                                                                                                                                                                                                                                                                          |
| Manuscript ID                   | bmjopen-2016-015041                                                                                                                                                                                                                                                                                                                                                                                                                                                                                                                                                                                                      |
| Article Type:                   | Research                                                                                                                                                                                                                                                                                                                                                                                                                                                                                                                                                                                                                 |
| Date Submitted by the Author:   | 07-Nov-2016                                                                                                                                                                                                                                                                                                                                                                                                                                                                                                                                                                                                              |
| Complete List of Authors:       | <p>Yang, Sheng-Hua<br/>           Du, Ying<br/>           Zhang, Yan<br/>           Li, Xiao-Lin<br/>           Li, Sha<br/>           Xu, Rui-Xia<br/>           Zhu, Cheng-Gang<br/>           Guo, Yuan-Lin<br/>           Wu, Na-Qiong<br/>           Qing, Ping<br/>           Gao, Ying<br/>           Cui, Chuan-Jue<br/>           Dong, Qian<br/>           Sun, Jing<br/>           Li, Jian-Jun; Division of Dyslipidemia, State Key Laboratory of Cardiovascular Disease, Fuwai Hospital, National Center for Cardiovascular Diseases, Chinese Academy of Medical Sciences, Peking Union Medical College</p> |
| <b>Primary Subject Heading</b>: | Cardiovascular medicine                                                                                                                                                                                                                                                                                                                                                                                                                                                                                                                                                                                                  |
| Secondary Subject Heading:      | Cardiovascular medicine, Diabetes and endocrinology                                                                                                                                                                                                                                                                                                                                                                                                                                                                                                                                                                      |
| Keywords:                       | Fibrinogen, type 2 diabetes mellitus, coronary artery disease, outcome                                                                                                                                                                                                                                                                                                                                                                                                                                                                                                                                                   |
|                                 |                                                                                                                                                                                                                                                                                                                                                                                                                                                                                                                                                                                                                          |

SCHOLARONE™  
Manuscripts

**BMJ Open****2016-11-5**

**Title:** Serum fibrinogen and cardiovascular events in Chinese type 2 diabetic patients with stable coronary artery disease: a prospective observational study

**Authors:** Sheng-Hua Yang, Ying Du, Yan Zhang, Xiao-Lin Li, Sha Li, Rui-Xia Xu, Cheng-Gang Zhu, Yuan-Lin Guo, Na-Qiong Wu, Ping Qing, Ying Gao, Chuan-Jue Cui, Qian Dong, Jing Sun, Jian-Jun Li

**Address:** Division of Dyslipidemia, State Key Laboratory of Cardiovascular Disease, Fuwai Hospital, National Center for Cardiovascular Diseases, Chinese Academy of Medical Sciences, Peking Union Medical College, BeiLiShi Road 167, Beijing 100037, China

**#Correspondence:** Professor Jian-Jun Li, MD, PhD. Division of Dyslipidemia, State Key Laboratory of Cardiovascular Disease, Fuwai Hospital, National Center for Cardiovascular Diseases, Chinese Academy of Medical Sciences, Peking Union Medical College, Beijing 100037, China.

**Tel:** 86+10+88396077;

**Fax:** 86+10+88396584;

**E-mail:** [lijianjun938@126.com](mailto:lijianjun938@126.com)

**Word count: 2126.**

## ABSTRACT

**Objectives:** The aim of this study was to investigate the association of serum fibrinogen with cardiovascular events (CVE) in Chinese patients with type 2 diabetes mellitus (T2DM) and stable coronary artery disease (CAD).

**Design:** An observational study.

**Setting:** FuWai Hospital in Beijing, China.

**Participants:** A cohort of 1466 T2DM patients with angiographic-proven stable CAD was evaluated.

**Outcome measures:** Baseline serum fibrinogen levels were measured and trisected into “low”, “middle” and “high”. Their association with CVE was explored using Cox proportional hazard models.

**Results:** With 20.2 months (average) follow-up, 44 (3%) were lost to follow-up, and 96 patients developed CVE. Compared with the patients without CVE, the ones who developed CVE had higher levels of fibrinogen. Univariable regression revealed a significant relation of fibrinogen to CVE (hazard ratio [HR] 1.25, 95% confidence interval [CI]: 1.06-1.47,  $P=0.010$ ) per standard deviation increase of fibrinogen at baseline. After adjusting for multiple established cardiovascular disease (CVD) risk factors, the association persisted (HR 1.30, 95% CI: 1.02-1.66,  $P=0.037$ ). Moreover, after adjusting for CVD risk factors, the HRs for middle and high serum fibrinogen concentration, using “low” group as reference, were 1.23 (95% CI: 0.69–2.20) and 2.20 (95% CI: 1.11–3.36,  $P=0.049$ ).

**Conclusions:** We firstly indicated that elevated fibrinogen level was independently associated with increased CVE in Chinese T2DM patients with stable CAD.

**Keywords:** Fibrinogen; type 2 diabetes mellitus; coronary artery disease; outcome

### Strengths and limitations of this study

1. Fibrinogen has been well established to be a strong and independent cardiovascular risk factor in general population.
2. Studies on the role of fibrinogen in cardiovascular outcomes in diabetes are both limited and controversial.
3. We, for the first time, reported that baseline fibrinogen was associated with cardiovascular events (CVEs) in Chinese type 2 diabetic patients with stable coronary artery disease.
4. The number of CVEs was relatively small and the follow-up duration was relatively short, so further study is needed.

## INTRODUCTION

Fibrinogen, as a marker of thrombosis and inflammation, is associated with cardiovascular diseases (CVD). It has been demonstrated that elevated fibrinogen level is significantly associated with intima-media thickness and subclinical atherosclerosis.<sup>1-5</sup> Also, previous study revealed that fibrinogen independently predicted future ischemic stroke risk and incident hypertension.<sup>6-8</sup> What's more, fibrinogen has been well established to be a strong and independent cardiovascular risk factor in general population.<sup>8-12</sup> Data suggested that baseline plasma fibrinogen level could predict cardiovascular events (CVE) in general individuals and nondiabetics.<sup>3,9,10,13</sup>

It is worthy of mentioning that individuals with type 2 diabetes mellitus (T2DM) have higher levels of plasma fibrinogen compared with those without T2DM.<sup>8,14</sup> The most common cause for mortality in patients with diabetes mellitus (DM) is coronary artery disease (CAD). Thereby, it is logically hypothesized that hyperfibrinogenemia could contribute to increase CVE in this disease. However, studies on the role of fibrinogen in cardiovascular outcomes in diabetes are both limited and controversial.<sup>6,15-17</sup>

Based on such situation and combined with a fact that no data is currently available so far with regard to the relationship between fibrinogen and CVE in T2DM patients with stable CAD, we, therefore, performed a prospective observational study of the association of baseline plasma fibrinogen and the risk of cardiovascular events in diabetic patients with stable coronary artery disease.

## Patients and Methods

### Study Population

In the present study, consecutive patients hospitalized in our division were screened between April 2011 and July 2015 for the following inclusion criteria: over the age of 18 years, type 2 diabetes mellitus and angiographic-proven stable coronary artery disease. Exclusion criteria were acute coronary syndrome (ACS), in-hospital cardiac death at first admission in our division, unavailable data of baseline fibrinogen concentration, the existence of any infectious or systematic inflammatory diseases, significant hematologic disorders, thyroid dysfunction, severe liver and/or renal insufficiency and malignant tumors. According to the inclusion and exclusion criteria, a total

1  
2  
3 of 1466 eligible patients were enrolled (**Figure 1**). The study was performed according to the  
4 Declaration of Helsinki, and the hospital ethics review board (Fuwai Hospital & National Center  
5 for Cardiovascular Diseases, Beijing, China) approved the protocol. All the subjects gave written  
6 informed consent.  
7  
8  
9

### 10 11 12 **Biochemical Analysis and Baseline Examination** 13

14 Overnight fasting blood samples were drawn from each patient at admission and centrifuged at  
15 room temperature within 2 hours. As described in our previous studies,<sup>18,19</sup> the plasma levels of  
16 fibrinogen were quantitatively measured by the method of Clauss and a Stago autoanalyzer with  
17 STA Fibrinogen kit (Diagnostic Stago, Taverny, France). Glucose, haemoglobin A1c (HbA1c), uric  
18 acid and lipid profile were determined by standard methods. The concentrations of high-sensitivity  
19 C-reactive protein (hs-CRP) were determined using immunoturbidimetry (Beckmann Assay 360,  
20 Bera, CA, USA).  
21  
22  
23  
24  
25  
26

27 Height and weight were measured, and body mass index (BMI) ( $\text{kg}/\text{m}^2$ ) was calculated.  
28 Diabetes mellitus was defined as a fasting plasma glucose  $\geq 126$  mg/dL (7.0 mmol/L) in multiple  
29 determinations, and/or the current use of medication for diabetes. Hypertension was defined as  
30 repeated blood pressure measurements  $\geq 140/90$  mmHg (at least 2 times in different environments)  
31 or currently taking antihypertensive drugs. Stable CAD was defined as typical angina-like chest  
32 pain brought on by exertion and relieved by rest or sublingual nitrates or both, a positive treadmill  
33 exercise test ( $>1$  mm ST-segment depression), and stable obstructive lesion  $>50\%$  in at least 1 of  
34 the 3 major coronary arteries or major branches assessed by at least 2 independent senior  
35 interventional cardiologists who had no knowledge of the patients' clinical characteristics and  
36 biochemical results. Dyslipidemia was considered to be present in patients if they had fasting total  
37 cholesterol (TC)  $\geq 200$  mg/dL or triglyceride (TG)  $\geq 150$  mg/dL.  
38  
39  
40  
41  
42  
43  
44  
45  
46  
47  
48

### 49 **Definition of Events and Follow-up** 50

51 The primary outcomes were CVE. CVE were defined as the cardiac death, stroke, nonfatal  
52 myocardial infarction (MI), post-discharge revascularization (PCI/CABG) due to clinical  
53 deterioration or unstable angina (UA). The follow-up data collection was performed by the trained  
54 nurses or cardiologists who were blinded to the aim of this study by means of standardized  
55  
56  
57  
58  
59  
60

1  
2  
3 telephone interviews at 6-month intervals. Follow-up time was calculated as the number of months  
4 from the enrollment till the last traceable hospital outpatient or inpatient record or telephone  
5 interview before March 2016, and was censored on the date of the first CVE. Death of a  
6 participant was reported by relatives or the general practitioner who treated the participant. Three  
7 experienced physicians who were blinded to any of the study data independently classified the  
8 events.  
9

### 10 11 12 13 14 **Statistical Analysis**

15  
16 Continuous variables were presented as mean  $\pm$  SD or median (25th, 75th percentiles) and  
17 categorical variables as percentages. Fibrinogen levels were trisected into “low” ( $\leq 2.91$  g/L),  
18 “middle” (2.91-3.51 g/L) and “high” ( $\geq 3.51$  g/L). Comparisons of continuous baseline data  
19 between two or more groups were performed with Student t test and ANOVA, respectively, and  $\chi^2$   
20 test was used to compare categorical data. Kruskal-Wallis H test was used for nonnormal variables.  
21 Participants who were lost during follow-up were treated as censored observations and not used  
22 for follow-up analysis. Using the Cox proportional hazards model, hazard ratios (HR) of CVE,  
23 with 95% confidence intervals, were calculated using crude models as well as models adjusted for  
24 potential confounding factors. A  $P < 0.05$  for two sided testing was considered statistically  
25 significant. The statistical analysis was performed with SPSS version 19.0 software (SPSS Inc.,  
26 Chicago, IL).  
27  
28  
29  
30  
31  
32  
33  
34  
35  
36  
37

## 38 **RESULTS**

### 39 40 **Baseline Characteristics**

41 The baseline demographic, clinical characteristics, and laboratory findings of the study cohort  
42 classified by outcome status (with cardiovascular events or not) were listed in **Table 1**. Compared  
43 with the patients without CVE, the ones who developed CVE had lower left ventricle ejection  
44 fraction (LVEF) but higher levels of fibrinogen, HbA1c, highly sensitive C-reactive protein and  
45 uric acid. Meanwhile, we found that there is a tendency to higher fasting triglyceride level in CVE  
46 group ( $P=0.054$ ). Additionally, there is no significant difference in age, BMI, gender, status of  
47 hypertension, smoking status and medical history between the patients with or without CVE.  
48  
49  
50  
51  
52  
53  
54

55 **Table 1** Characteristics of the study cohort with and without cardiovascular events of myocardial  
56

infarction, cardiac death, myocardial revascularization and fatal or nonfatal stroke

|                                           | CVE (n=96)        | No CVE (n=1326)   | <i>p</i>         |
|-------------------------------------------|-------------------|-------------------|------------------|
| Age (years)                               | 58.54 ± 10.65     | 59.29 ± 9.81      | 0.473            |
| Body Mass Index (kg/m <sup>2</sup> )      | 26.32 ± 3.07      | 26.22 ± 3.21      | 0.790            |
| Gender, men, % (n)                        | 70.8 (68)         | 70.7 (938)        | 0.984            |
| Dyslipidemia, % (n)                       | 88.5 (85)         | 80.6 (1068)       | 0.055            |
| Hypertension, % (n)                       | 78.1 (75)         | 72.9 (966)        | 0.265            |
| Current smoking, % (n)                    | 56.3 (54)         | 51.2 (679)        | 0.343            |
| Previous PCI, %(n)                        | 22.9 (22)         | 24.0 (318)        | 0.810            |
| Previous CABG, %(n)                       | 1.0 (1)           | 3.4 (45)          | 0.208            |
| Family history of CAD, % (n)              | 17.7 (17)         | 14.8 (195)        | 0.224            |
| Systolic Blood Pressure (mmHg)            | 124.94 ± 14.64    | 127.86 ± 16.41    | 0.117            |
| Diastolic Blood Pressure (mmHg)           | 74.93 ± 9.12      | 77.01 ± 10.17     | 0.071            |
| Left Ventricle Ejection Fraction (%)      | 60.4 ± 10.2       | 63.7 ± 8.0        | <b>&lt;0.001</b> |
| Total Cholesterol (mmol/L)                | 4.10 ± 1.16       | 4.10 ± 1.21       | 0.962            |
| HDL-cholesterol (mmol/L)                  | 0.98 ± 0.28       | 1.03 ± 0.27       | 0.126            |
| LDL-cholesterol (mmol/L)                  | 2.44 ± 0.99       | 2.46 ± 0.96       | 0.827            |
| Triglycerides (mmol/L)                    | 1.79 (1.28, 2.53) | 1.56 (1.18, 2.21) | 0.054            |
| Apo A1 (g/L)                              | 1.36 ± 0.37       | 1.32 ± 0.28       | 0.140            |
| Apo B (g/L)                               | 0.99 ± 0.34       | 0.94 ± 0.33       | 0.113            |
| HbA1c (%)                                 | 7.89 ± 1.54       | 7.50 ± 1.33       | <b>0.007</b>     |
| Glucose (mmol/L)                          | 7.52 ± 2.68       | 7.18 ± 2.28       | 0.155            |
| Highly Sensitive C-reactive Protein, mg/L | 1.83 (1.08, 4.47) | 1.54 (0.77, 3.23) | <b>0.017</b>     |
| Uric acid (umol/L)                        | 368.39 ± 96.44    | 340.26 ± 93.36    | <b>0.005</b>     |
| Fibrinogen (g/L)                          | 3.52 ± 0.85       | 3.30 ± 0.8        | <b>0.015</b>     |
| Medication                                |                   |                   |                  |
| Statin, % (n)                             | 69.8 (67)         | 71.9 (953)        | 0.707            |
| Aspirin, % (n)                            | 88.1 (84)         | 86.7 (1149)       | 0.794            |
| Beta-blocker, % (n)                       | 52.4 (50)         | 48.2 (639)        | 0.601            |
| Calcium Channel Blocker                   | 11.5 (11)         | 20.7 (275)        | 0.166            |
| ACEI/ARB                                  | 30.0 (29)         | 26.5 (351)        | 0.521            |

Data are presented as mean ± SD, median (25th, 75th percentiles) or % (n). CVE: cardiovascular events; Apo: apolipoprotein; HbA1c: Glycosylated Hemoglobin, TypeA1C; ACEI/ARB: Angiotensin Converting EnzymeInhibitor / Angiotensin IIReceptor Blocker

**Table 2** compared the baseline cardiovascular risk profiles of the study population, divided into “low” ( $\geq 2.91$  g/L), “middle” (2.91-3.51 g/L) and “high” ( $\geq 3.51$  g/L) subgroups on the basis of the fibrinogen concentration. The patients with middle and high levels of fibrinogen had higher percentage of CVE, female, and higher levels of hs-CRP, total cholesterol, LDL-C, HbA1c and fasting glucose compared with the “low” group. No significant difference was found in age, BMI,



blood pressure and smoking status.

**Table 2.** Baseline characteristics of the cohort of the diabetic patients with stable CAD according to plasma fibrinogen levels at baseline

| Variables                | Fibrinogen Tertiles(g/L)       |                               |                                 | p                |
|--------------------------|--------------------------------|-------------------------------|---------------------------------|------------------|
|                          | Low ( $\leq 2.91$ )<br>(n=476) | Middle (2.91-3.51)<br>(n=476) | High ( $\geq 3.51$ )<br>(n=470) |                  |
| Age (years)              | 58.65 $\pm$ 9.66               | 59.16 $\pm$ 9.69              | 59.91 $\pm$ 10.22               | 0.142            |
| BMI (kg/m <sup>2</sup> ) | 26.21 $\pm$ 3.08               | 26.18 $\pm$ 2.92              | 26.30 $\pm$ 3.58                | 0.838            |
| Gender, men, % (n)       | 78.4 (373)                     | 68.5 (326)                    | 65.3 (307)                      | <b>&lt;0.001</b> |
| Dyslipidemia, % (n)      | 80.5 (383)                     | 81.1 (385)                    | 81.9 (385)                      | 0.848            |
| Hypertension, % (n)      | 71.4 (340)                     | 72.0 (342)                    | 76.4 (359)                      | 0.170            |
| Current smoking, % (n)   | 53.2 (253)                     | 53.3 (253)                    | 48.3 (227)                      | 0.219            |
| SBP (mmHg)               | 126.82 $\pm$ 15.45             | 127.57 $\pm$ 17.08            | 127.58 $\pm$ 17.04              | 0.723            |
| DBP (mmHg)               | 76.60 $\pm$ 10.00              | 77.07 $\pm$ 10.26             | 76.64 $\pm$ 10.15               | 0.731            |
| TC (mmol/L)              | 3.86 $\pm$ 1.05                | 4.17 $\pm$ 1.17               | 4.27 $\pm$ 1.24                 | <b>&lt;0.001</b> |
| HDL-C (mmol/L)           | 1.02 $\pm$ 0.25                | 1.03 $\pm$ 0.26               | 1.03 $\pm$ 0.30                 | 0.739            |
| LDL-C (mmol/L)           | 2.28 $\pm$ 0.89                | 2.52 $\pm$ 0.94               | 2.60 $\pm$ 1.01                 | <b>&lt;0.001</b> |
| Triglycerides (mmol/L)   | 1.57 (1.12, 2.13)              | 1.60 (1.24, 2.34)             | 1.54 (1.19, 2.17)               | 0.092            |
| HbA1C (%)                | 7.23 $\pm$ 1.23                | 7.52 $\pm$ 1.28               | 7.84 $\pm$ 1.46                 | <b>&lt;0.001</b> |
| Glucose (mmol/L)         | 6.81 $\pm$ 2.10                | 7.22 $\pm$ .32                | 7.58 $\pm$ 2.43                 | <b>&lt;0.001</b> |
| Hs-CRP, mg/L             | 0.88 (0.52, 1.45)              | 1.54 (0.82, 2.71)             | 3.64 (1.83, 8.34)               | <b>&lt;0.001</b> |
| Uric acid (umol/L)       | 340.93 $\pm$ 95.56             | 339.06 $\pm$ 86.97            | 346.60 $\pm$ 98.62              | 0.441            |
| CVD events, % (n)        | 5.0 (24)                       | 5.7 (27)                      | 9.6 (45)                        | <b>0.011</b>     |
| Fibrinogen (g/L)         | 2.55 $\pm$ 0.31                | 3.21 $\pm$ 0.16               | 4.20 $\pm$ 0.74                 | <b>&lt;0.001</b> |

Data are presented as mean  $\pm$  SD, median (25<sup>th</sup>, 75<sup>th</sup> percentiles) or % (n). CAD, coronary artery disease; BMI, body mass index; SBP, systolic blood pressure; DBP, diastolic blood pressure; TC, total cholesterol; hs-CRP, high-sensitivity C-reactive protein; CVD events: myocardial infarction, cardiac death, myocardial revascularization and fatal or nonfatal stroke.

## Outcomes

The average follow-up time was 20.2 months (range from 0.4 to 49.3). During the follow-up period, 96 patients experienced cardiovascular event: 19 (19.8%) nonfatal myocardial infarctions (MIs), 55 (57.3%) myocardial revascularization procedures (PCI or CABG) because of clinical deterioration, 15 (15.6%) strokes and 7 (7.3%) cardiac deaths. Patients suffered ACS and underwent revascularization procedures were assigned once in the analysis. Of the 1466 diabetic patients with stable coronary artery disease, 44 (3%) were lost to follow-up. Therefore, the data of 1422 participants were used for follow-up analysis.

### Hazard Ratios of Fibrinogen for Study Outcomes

Univariable regression revealed significant association between serum fibrinogen level at baseline and CVE (HR=1.25, 95% confidence interval [CI]: 1.06-1.47,  $P=0.010$ ) per standard deviation (SD) increase of serum fibrinogen at baseline. After adjusting for multiple established CVD risk factors, the association persisted (HR=1.30, 95% CI: 1.02-1.66,  $P=0.037$ ) (Table 3). Unadjusted HR for developing a CVE was significantly increased in the “high” group compared with the “low” group at baseline, and similar results were also found after adjusting for sex and age (Figure 2). After adjusting for established CVD risk factors, the HR for middle and high serum fibrinogen concentration, using “low” group as reference, were 1.23 (95% CI: 0.69–2.20) and 2.20 (95% CI: 1.11–3.36) ( $P$  for trend 0.049)(Table 3).

**Table 3.** Hazard Ratios for Cardiovascular Disease Events Association with the Plasma Levels of Fibrinogen (low, middle and high)

| Model   | Hazard Ratio (95% CI) |                          |                   | $p$ for trend |
|---------|-----------------------|--------------------------|-------------------|---------------|
|         | Low<br>(Reference)    | Middle                   | High              |               |
| Crude   | 1.00                  | 1.10 (0.64, 1.91)        | 1.99 (1.21, 3.26) | 0.008         |
| Model 1 | 1.00                  | 1.10 (0.64, 1.92)        | 2.00 (1.22, 3.30) | 0.007         |
| Model 2 | 1.00                  | 1.09 (0.63, 1.89)        | 1.97 (1.19, 3.26) | 0.009         |
| Model 3 | 1.00                  | 1.14 (0.65, 2.00)        | 2.15 (1.22, 3.80) | 0.012         |
| Model 4 | 1.00                  | 1.23 (0.69, 2.19)        | 2.10 (1.16, 3.80) | 0.031         |
| Model 5 | 1.00                  | 1.23 (0.69, 2.20)        | 2.02 (1.11, 3.68) | 0.049         |
|         |                       | 1 SD fibrinogen increase |                   | $p$           |
| Crude   |                       | 1.25 (1.06, 1.48)        |                   | 0.010         |
| Model 1 |                       | 1.26 (1.06, 1.49)        |                   | 0.008         |
| Model 2 |                       | 1.25 (1.05, 1.49)        |                   | 0.013         |
| Model 3 |                       | 1.36 (1.07, 1.72)        |                   | 0.011         |
| Model 4 |                       | 1.34 (1.05, 1.71)        |                   | 0.017         |
| Model 5 |                       | 1.30 (1.02, 1.66)        |                   | 0.037         |

Model 1: adjusted for sex, and age; Model 2: Model 1+ total cholesterol, high-density lipoprotein cholesterol, hypertension, and smoking; Model 3: Model 2+ triglycerides, hs-CRP, and HbA1c; Model 4: Model 3+uric acid, body mass index, and family history of CVD, and Model 5: Model 4+Left Ventricle Ejection Fraction. CVD, cardiovascular disease; SD, standard deviation

## DISCUSSION

In this prospective observational study in single center with a relative large sample size, we, for the first time, found that baseline fibrinogen concentration was independently associated with

1  
2  
3 CVE in Chinese type 2 diabetic patients with stable CAD. Although the study might be limited by  
4 follow-up duration, the present data provided novel and important information with regard to the  
5 key issue whether the baseline fibrinogen concentration can be a marker for predicting the clinical  
6 outcomes in T2DM patients with stable CAD.  
7  
8  
9

10 Sufficient evidence has demonstrated that plasma fibrinogen is a risk factor for cardiovascular  
11 disease in general population,<sup>3,6,8-10</sup> but the role of fibrinogen in diabetes remains controversial.  
12 Some previous studies demonstrated that hyperfibrinogenemia was an important risk factor for  
13 vascular complications in diabetes.<sup>20</sup> For instance, a prospective cohort of 2329 patients with type  
14 1 diabetes revealed that fibrinogen was significant and independent predictor of coronary heart  
15 disease in men.<sup>15</sup> Moreover, increased fibrinogen level was shown to be associated with diabetic  
16 nephropathy in type 2 diabetics<sup>21,22</sup> and in type 1 diabetics.<sup>15,23,24</sup> Gargano Heart Study (GHS)  
17 showed that fibrinogen was a predictor of incident major CVE after adjusting for sex, age,  
18 smoking habit and BMI status in diabetics.<sup>25</sup> In parallel, Bruno et al reported that fibrinogen had  
19 an independent predictive effect on cardiovascular mortality in T2DM.<sup>26</sup> Furthermore, Stehouwer  
20 et al. revealed that baseline fibrinogen concentrations were strongly and independently associated  
21 with risk of all-cause death in type 2 diabetics.<sup>27</sup> On the contrary, some studies reported that the  
22 association between fibrinogen and incident CAD in patients with T2DM was non-significant via  
23 multivariable analyses.<sup>17,28</sup> As we well known, the major cause of death in T2DM is  
24 macrovascular complications, especially CAD. Hence, in the present study, we enrolled  
25 angiographic-proven CAD patients with T2DM and tried to examine the role of fibrinogen in such  
26 a study population of type 2 diabetic patients with CAD. We found that elevated fibrinogen level  
27 at baseline was associated with increased CVE in T2DM patients with stable CAD. Additionally,  
28 we also found that fibrinogen was higher among those patients who developed a cardiovascular  
29 event compared with those who did not, which is in agreement with previous studies.<sup>9,13</sup> To our  
30 knowledge, this is the first time to investigate the relationship between fibrinogen and CVE in  
31 T2DM patients with stable CAD.  
32  
33  
34  
35  
36  
37  
38  
39  
40  
41  
42  
43  
44  
45  
46  
47  
48  
49

50 Recently the ADVANCE study (Action in Diabetes and Vascular Disease: Preterax and  
51 Diamicon Modified Release Controlled Evaluation) reported that baseline fibrinogen level was  
52 associated with an increased risk of macrovascular events and death in univariate analysis, but  
53 after further adjustment, fibrinogen was not an independent predictor of macrovascular.<sup>17</sup> In the  
54  
55  
56  
57  
58  
59  
60

1  
2  
3 present study, our finding is not consistent with the ADVANCE study, and we speculate that some  
4 reasons could explain it. Firstly, the inclusive criteria are different: we chose the patients with  
5 T2DM and stable CAD, while the ADVANCE study chose the subjects with T2DM and a history  
6 of CVD (stroke, myocardial infarction, transient ischemic attack, unstable angina, coronary or  
7 peripheral revascularization, amputation, macroalbuminuria, proliferative retinopathy or  
8 photocoagulation, macular edema, or blindness in one eye) or one or more additional  
9 cardiovascular risk factors. Secondly, despite the patients from many countries in the ADVANCE  
10 study, Chinese and Indians were excluded. Actually, there are ethnic differences in fibrinogen  
11 levels.<sup>29-32</sup> Thus, whether the results also persist in Chinese is undetermined. Finally, the  
12 definitions of outcomes are different. In ADVANCE study, major macrovascular events were  
13 cardiovascular death, nonfatal myocardial infarction, or nonfatal stroke, while our cardiovascular  
14 events were defined as cardiac death, stroke, nonfatal myocardial infarction (MI), post-discharge  
15 revascularization (PCI/CABG) due to clinical deterioration or unstable angina (UA). Additionally,  
16 our previous cross-sectional study has revealed that plasma fibrinogen is associated with severity  
17 of coronary artery disease evaluated using Gensini score in diabetic patients,<sup>19</sup> which partly  
18 supports our present finding.

19  
20  
21  
22  
23  
24  
25  
26  
27  
28  
29  
30  
31  
32  
33  
34  
35  
36  
37  
38  
39  
40  
41  
42  
43  
44  
45  
46  
47  
48  
49  
50  
51  
52  
53  
54  
55  
56  
57  
58  
59  
60  
There were several limitations of the present study. Firstly, the number of events is relatively  
small to assess the prognostic value of fibrinogen. The conclusion needs to be testified by  
large-scale study in the future. Secondly, the follow-up duration was relatively short and longer  
follow-up will be required. Thirdly, this sample population was collected prospectively from a  
single center in China, and studies from multiple centers are needed to test our finding.

In conclusion, we found that fibrinogen was associated with cardiovascular events in patients  
with type 2 diabetes with stable CAD in Chinese population. Further studies are required to clarify  
the issue completely.

**Contributors** S-H Y analyzed the data and drafted the manuscript. J-J L planned, designed the  
study, participated in fundraising and corrected the final version. YD, YZ, X-L L and SL  
participated in collecting data and interpreted the results. R-X X, C-G Z, Y-L G and N-Q W  
participated in the study design, interpretation of the results and manuscript review. PQ, YG, C-J

1  
2  
3 C and QD participated in collecting data and reviewing manuscript. All authors read and have  
4  
5 approved the final manuscript.  
6  
7

8 **Funding** This work was partially supported by the National Natural Science Foundation of China  
9  
10 (81070171, 81241121), the Specialized Research Fund for the Doctoral Program of Higher  
11  
12 Education of China (20111106110013), the Capital Special Foundation of Clinical Application  
13  
14 Research (Z121107001012015), the Capital Health Development Fund (2011400302), and the  
15  
16 Beijing Natural Science Foundation (7131014) awarded to Dr. Jian-Jun Li, MD, PhD.

17 **Competing interests** The authors declare that they have no completing interests.  
18  
19

20 **Patient consent** Obtained.  
21

22 **Ethics approval** The study was performed according to the Declaration of Helsinki, and the  
23  
24 hospital ethics review board (Fuwai Hospital & National Center for Cardiovascular Diseases,  
25  
26 Beijing, China) approved the protocol.  
27  
28

29 **Data sharing statement** The technical appendix, statistical code and data set are available from  
30  
31 the corresponding author.  
32  
33  
34  
35

## 36 REFERENCES

- 37  
38 1. Sabeti S, Exner M, Mlekusch W, *et al.* Prognostic impact of fibrinogen in carotid  
39  
40 atherosclerosis: nonspecific indicator of inflammation or independent predictor of disease  
41  
42 progression? *Stroke* 2005;36:1400-4.
- 43 2. Green D, Foiles N, Chan C, *et al.* Elevated fibrinogen levels and subsequent subclinical  
44  
45 atherosclerosis: the CARDIA Study. *Atherosclerosis* 2009;202:623-31.
- 46 3. De Luca G, Verdoia M, Cassetti E, *et al.* High fibrinogen level is an independent predictor of  
47  
48 presence and extent of coronary artery disease among Italian population. *J Thromb*  
49  
50 *Thrombolysis* 2011;31:458-63.
- 51 4. Temelkova-Kurktschiev T, Koehler C, Henkel E, *et al.* Leukocyte count and fibrinogen are  
52  
53 associated with carotid and femoral intima-media thickness in a risk population for diabetes.  
54  
55 *Cardiovasc Res* 2002;56:277-83.
- 56 5. Willeit P, Thompson SG, Agewall S, *et al.* Inflammatory markers and extent and progression of  
57  
58 early atherosclerosis: Meta-analysis of individual-participant-data from 20 prospective  
59  
60 studies of the PROG-IMT collaboration. *Eur J Prev Cardiol* 2016;23:194-205.
6. Chuang SY, Bai CH, Chen WH, *et al.* Fibrinogen Independently Predicts the Development of

- 1  
2  
3 Ischemic Stroke in a Taiwanese Population: CVDFACTS Study. *Stroke* 2009;40:1578-84.
- 4 7. Shankar A, Wang JJ, Rohtchina E, *et al.* Positive association between plasma fibrinogen level  
5 and incident hypertension among men: population-based cohort study. *Hypertension*  
6 2006;48:1043-9.
- 7  
8 8. Danesh J, Lewington S, Thompson SG, *et al.* Plasma fibrinogen level and the risk of major  
9 cardiovascular diseases and nonvascular mortality: an individual participant meta-analysis.  
10 *JAMA* 2005;294:1799-809.
- 11 9. Sinning JM, Bickel C, Messow CM, *et al.* Impact of C-reactive protein and fibrinogen on  
12 cardiovascular prognosis in patients with stable angina pectoris: the AtheroGene study. *Eur*  
13 *Heart J* 2006;27:2962-8.
- 14 10. Collaboration TERF. C-Reactive Protein, Fibrinogen, and Cardiovascular Disease Prediction. *N*  
15 *Engl J Med* 2012;367:1310-20.
- 16 11. Park CS, Ihm S-H, Yoo K-D, *et al.* Relation Between C-Reactive Protein, Homocysteine Levels,  
17 Fibrinogen, and Lipoprotein Levels and Leukocyte and Platelet Counts, and 10-Year Risk for  
18 Cardiovascular Disease Among Healthy Adults in the USA. *Am J Cardiol* 2010;105:1284-88.
- 19 12. Danesh J, Collins R, Appleby P, *et al.* Association of fibrinogen, C-reactive protein, albumin, or  
20 leukocyte count with coronary heart disease: meta-analyses of prospective studies. *JAMA*  
21 1998;279:1477-82.
- 22 13. Luc G. C-Reactive Protein, Interleukin-6, and Fibrinogen as Predictors of Coronary Heart  
23 Disease: The PRIME Study. *Arterioscler Thromb Vasc Biol* 2003;23:1255-61.
- 24 14. Barazzoni R, Zanetti M, Davanzo G, *et al.* Increased fibrinogen production in type 2 diabetic  
25 patients without detectable vascular complications: correlation with plasma glucagon  
26 concentrations. *J Clin Endocrinol Metab* 2000;85:3121-5.
- 27 15. Soedamah-Muthu SS, Chaturvedi N, Pickup JC, *et al.* Relationship between plasma sialic acid  
28 and fibrinogen concentration and incident micro- and macrovascular complications in type 1  
29 diabetes. The EURODIAB Prospective Complications Study (PCS). *Diabetologia*  
30 2008;51:493-501.
- 31 16. Engstrom G, Stavenow L, Hedblad B, *et al.* Inflammation-sensitive plasma proteins, diabetes,  
32 and mortality and incidence of myocardial infarction and stroke: a population-based study.  
33 *Diabetes* 2003;52:442-7.
- 34 17. Lowe G, Woodward M, Hillis G, *et al.* Circulating inflammatory markers and the risk of  
35 vascular complications and mortality in people with type 2 diabetes and cardiovascular  
36 disease or risk factors: the ADVANCE study. *Diabetes* 2014;63:1115-23.
- 37 18. Zhang Y, Zhu C-G, Xu R-X, *et al.* Relation of circulating PCSK9 concentration to fibrinogen in  
38 patients with stable coronary artery disease. *J Clin Lipidol* 2014;8:494-500.
- 39 19. Hong L-F, Li X-L, Luo S-H, *et al.* Association of Fibrinogen with Severity of Stable Coronary  
40 Artery Disease in Patients with Type 2 Diabetic Mellitus. *Dis Markers* 2014;2014:1-8.
- 41 20. Ganda OP, Arkin CF. Hyperfibrinogenemia. An important risk factor for vascular complications  
42 in diabetes. *Diabetes Care* 1992;15:1245-50.
- 43 21. Tessari P, Kiwanuka E, Barazzoni R, *et al.* Diabetic nephropathy is associated with increased  
44 albumin and fibrinogen production in patients with type 2 diabetes. *Diabetologia*  
45 2006;49:1955-61.
- 46 22. Azad N, Agrawal L, Emanuele NV, *et al.* Association of PAI-1 and fibrinogen with diabetic  
47 retinopathy in the Veterans Affairs Diabetes Trial (VADT). *Diabetes Care* 2014;37:501-6.
- 48  
49  
50  
51  
52  
53  
54  
55  
56  
57  
58  
59  
60

23. Klein RL, Hunter SJ, Jenkins AJ, *et al.* Fibrinogen is a marker for nephropathy and peripheral vascular disease in type 1 diabetes: studies of plasma fibrinogen and fibrinogen gene polymorphism in the DCCT/EDIC cohort. *Diabetes Care* 2003;26:1439-48.
24. Polat SB, Ugurlu N, Yulek F, *et al.* Evaluation of serum fibrinogen, plasminogen, alpha2-anti-plasmin, and plasminogen activator inhibitor levels (PAI) and their correlation with presence of retinopathy in patients with type 1 DM. *J Diabetes Res* 2014;2014:317292.
25. Pacilli A, De Cosmo S, Trischitta V, *et al.* Role of relationship between HbA1c, fibrinogen and HDL-cholesterol on cardiovascular disease in patients with type 2 diabetes mellitus. *Atherosclerosis* 2013;228:247-8.
26. Bruno G, Merletti F, Biggeri A, *et al.* Fibrinogen and AER are major independent predictors of 11-year cardiovascular mortality in type 2 diabetes: the Casale Monferrato Study. *Diabetologia* 2005;48:427-34.
27. Stehouwer CD, Gall MA, Twisk JW, *et al.* Increased urinary albumin excretion, endothelial dysfunction, and chronic low-grade inflammation in type 2 diabetes: progressive, interrelated, and independently associated with risk of death. *Diabetes* 2002;51:1157-65.
28. Saito I, Folsom AR, Brancati FL, *et al.* Nontraditional risk factors for coronary heart disease incidence among persons with diabetes: the Atherosclerosis Risk in Communities (ARIC) Study. *Ann Intern Med* 2000;133:81-91.
29. Cook DG, Cappuccio FP, Atkinson RW, *et al.* Ethnic differences in fibrinogen levels: the role of environmental factors and the beta-fibrinogen gene. *Am J Epidemiol* 2001;153:799-806.
30. Albert MA. Inflammatory biomarkers, race/ethnicity and cardiovascular disease. *Nutr Rev* 2007;65:S234-8.
31. Albert MA, Glynn RJ, Buring JE, *et al.* Relation between soluble intercellular adhesion molecule-1, homocysteine, and fibrinogen levels and race/ethnicity in women without cardiovascular disease. *Am J Cardiol* 2007;99:1246-51.
32. Albert MA, Pare G, Morris A, *et al.* Candidate genetic variants in the fibrinogen, methylenetetrahydrofolate reductase, and intercellular adhesion molecule-1 genes and plasma levels of fibrinogen, homocysteine, and intercellular adhesion molecule-1 among various race/ethnic groups: data from the Women's Genome Health Study. *Am Heart J* 2009;157:777-83.e1.

## Figure legends

Figure 1 Flow chart of the study. CAD, coronary artery disease.

Figure 2 Unadjusted (A) and adjusted by sex and age (B) cumulative hazard of cardiovascular events based on the levels of fibrinogen (low, middle and high).

1  
2  
3  
4  
5  
6  
7  
8  
9  
10  
11  
12  
13  
14  
15  
16  
17  
18  
19  
20  
21  
22  
23  
24  
25  
26  
27  
28  
29  
30  
31  
32  
33  
34  
35  
36  
37  
38  
39  
40  
41  
42  
43  
44  
45  
46  
47  
48  
49  
50  
51  
52  
53  
54  
55  
56  
57  
58  
59  
60

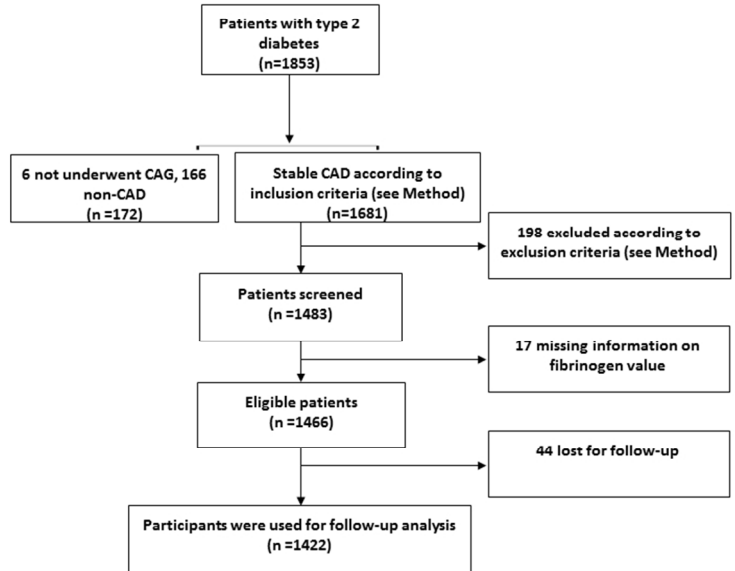

Figure 1 Flow chart of the study. CAD, coronary artery disease.

254x190mm (96 x 96 DPI)



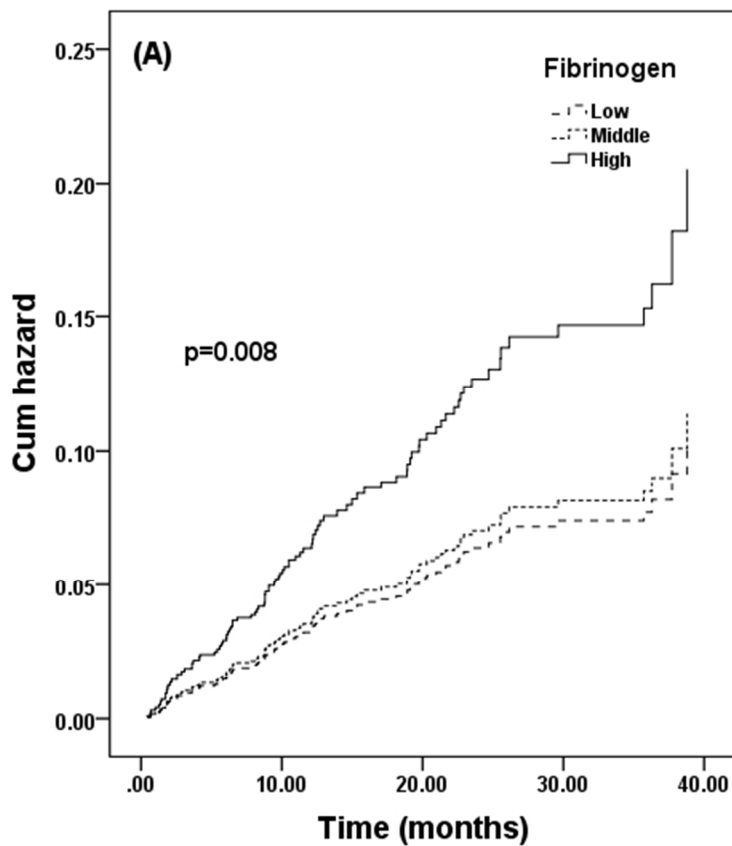

220x190mm (72 x 72 DPI)

only

1  
2  
3  
4  
5  
6  
7  
8  
9  
10  
11  
12  
13  
14  
15  
16  
17  
18  
19  
20  
21  
22  
23  
24  
25  
26  
27  
28  
29  
30  
31  
32  
33  
34  
35  
36  
37  
38  
39  
40  
41  
42  
43  
44  
45  
46  
47  
48  
49  
50  
51  
52  
53  
54  
55  
56  
57  
58  
59  
60

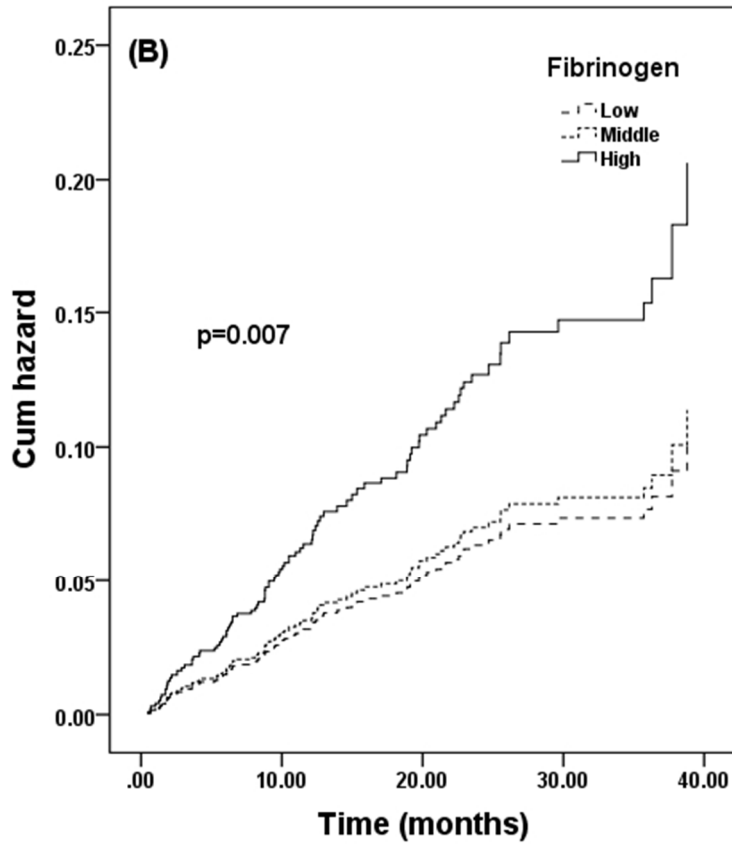

220x190mm (72 x 72 DPI)

only

## STROBE Statement—checklist of items that should be included in reports of observational studies

|                              | Item No | Recommendation                                                                                                                                                                             | Page number |
|------------------------------|---------|--------------------------------------------------------------------------------------------------------------------------------------------------------------------------------------------|-------------|
| <b>Title and abstract</b>    | 1       | (a) Indicate the study's design with a commonly used term in the title or the abstract                                                                                                     | 1           |
|                              |         | (b) Provide in the abstract an informative and balanced summary of what was done and what was found                                                                                        | 2           |
| <b>Introduction</b>          |         |                                                                                                                                                                                            |             |
| Background/rationale         | 2       | Explain the scientific background and rationale for the investigation being reported                                                                                                       | 3           |
| Objectives                   | 3       | State specific objectives, including any prespecified hypotheses                                                                                                                           | 3           |
| <b>Methods</b>               |         |                                                                                                                                                                                            |             |
| Study design                 | 4       | Present key elements of study design early in the paper                                                                                                                                    | 3           |
| Setting                      | 5       | Describe the setting, locations, and relevant dates, including periods of recruitment, exposure, follow-up, and data collection                                                            | 3,4         |
| Participants                 | 6       | (a) <i>Cohort study</i> —Give the eligibility criteria, and the sources and methods of selection of participants. Describe methods of follow-up                                            | 3           |
|                              |         | <i>Case-control study</i> —Give the eligibility criteria, and the sources and methods of case ascertainment and control selection. Give the rationale for the choice of cases and controls |             |
|                              |         | <i>Cross-sectional study</i> —Give the eligibility criteria, and the sources and methods of selection of participants                                                                      |             |
|                              |         | (b) <i>Cohort study</i> —For matched studies, give matching criteria and number of exposed and unexposed                                                                                   | 3           |
|                              |         | <i>Case-control study</i> —For matched studies, give matching criteria and the number of controls per case                                                                                 |             |
| Variables                    | 7       | Clearly define all outcomes, exposures, predictors, potential confounders, and effect modifiers. Give diagnostic criteria, if applicable                                                   | 4           |
| Data sources/<br>measurement | 8*      | For each variable of interest, give sources of data and details of methods of assessment (measurement). Describe comparability of assessment methods if there is more than one group       | 4           |
| Bias                         | 9       | Describe any efforts to address potential sources of bias                                                                                                                                  |             |
| Study size                   | 10      | Explain how the study size was arrived at                                                                                                                                                  | 3, 5        |
| Quantitative variables       | 11      | Explain how quantitative variables were handled in the analyses. If applicable, describe which groupings were chosen and why                                                               | 5           |
| Statistical methods          | 12      | (a) Describe all statistical methods, including those used to control for confounding                                                                                                      | 5           |
|                              |         | (b) Describe any methods used to examine subgroups and interactions                                                                                                                        | 5           |
|                              |         | (c) Explain how missing data were addressed                                                                                                                                                | 4           |
|                              |         | (d) <i>Cohort study</i> —If applicable, explain how loss to follow-up was addressed                                                                                                        | 4           |
|                              |         | <i>Case-control study</i> —If applicable, explain how matching of cases and controls was addressed                                                                                         |             |
|                              |         | <i>Cross-sectional study</i> —If applicable, describe analytical methods taking account of sampling strategy                                                                               |             |
|                              |         | (e) Describe any sensitivity analyses                                                                                                                                                      | 4           |

Continued on next page

1  
2  
3  
4  
5  
6  
7  
8  
9  
10  
11  
12  
13  
14  
15  
16  
17  
18  
19  
20  
21  
22  
23  
24  
25  
26  
27  
28  
29  
30  
31  
32  
33  
34  
35  
36  
37  
38  
39  
40  
41  
42  
43  
44  
45  
46  
47  
48  
49  
50  
51  
52  
53  
54  
55  
56  
57  
58  
59  
60**Results**

|                  |     |                                                                                                                                                                                                                                                                                                                                                                                                               |                   |
|------------------|-----|---------------------------------------------------------------------------------------------------------------------------------------------------------------------------------------------------------------------------------------------------------------------------------------------------------------------------------------------------------------------------------------------------------------|-------------------|
| Participants     | 13* | (a) Report numbers of individuals at each stage of study—eg numbers potentially eligible, examined for eligibility, confirmed eligible, included in the study, completing follow-up, and analysed<br>(b) Give reasons for non-participation at each stage<br>(c) Consider use of a flow diagram                                                                                                               | 4                 |
| Descriptive data | 14* | (a) Give characteristics of study participants (eg demographic, clinical, social) and information on exposures and potential confounders<br>(b) Indicate number of participants with missing data for each variable of interest<br>(c) <i>Cohort study</i> —Summarise follow-up time (eg, average and total amount)                                                                                           | 7                 |
| Outcome data     | 15* | <i>Cohort study</i> —Report numbers of outcome events or summary measures over time<br><i>Case-control study</i> —Report numbers in each exposure category, or summary measures of exposure<br><i>Cross-sectional study</i> —Report numbers of outcome events or summary measures                                                                                                                             | 7                 |
| Main results     | 16  | (a) Give unadjusted estimates and, if applicable, confounder-adjusted estimates and their precision (eg, 95% confidence interval). Make clear which confounders were adjusted for and why they were included<br>(b) Report category boundaries when continuous variables were categorized<br>(c) If relevant, consider translating estimates of relative risk into absolute risk for a meaningful time period | 6-8<br>6-8<br>6-8 |
| Other analyses   | 17  | Report other analyses done—eg analyses of subgroups and interactions, and sensitivity analyses                                                                                                                                                                                                                                                                                                                | 7,8               |

**Discussion**

|                  |    |                                                                                                                                                                            |      |
|------------------|----|----------------------------------------------------------------------------------------------------------------------------------------------------------------------------|------|
| Key results      | 18 | Summarise key results with reference to study objectives                                                                                                                   | 8,9  |
| Limitations      | 19 | Discuss limitations of the study, taking into account sources of potential bias or imprecision. Discuss both direction and magnitude of any potential bias                 | 10   |
| Interpretation   | 20 | Give a cautious overall interpretation of results considering objectives, limitations, multiplicity of analyses, results from similar studies, and other relevant evidence | 9,10 |
| Generalisability | 21 | Discuss the generalisability (external validity) of the study results                                                                                                      | 10   |

**Other information**

|         |    |                                                                                                                                                               |       |
|---------|----|---------------------------------------------------------------------------------------------------------------------------------------------------------------|-------|
| Funding | 22 | Give the source of funding and the role of the funders for the present study and, if applicable, for the original study on which the present article is based | 10,11 |
|---------|----|---------------------------------------------------------------------------------------------------------------------------------------------------------------|-------|

\*Give information separately for cases and controls in case-control studies and, if applicable, for exposed and unexposed groups in cohort and cross-sectional studies.

**Note:** An Explanation and Elaboration article discusses each checklist item and gives methodological background and published examples of transparent reporting. The STROBE checklist is best used in conjunction with this article (freely available on the Web sites of PLoS Medicine at <http://www.plosmedicine.org/>, Annals of Internal Medicine at <http://www.annals.org/>, and Epidemiology at <http://www.epidem.com/>). Information on the STROBE Initiative is available at [www.strobe-statement.org](http://www.strobe-statement.org).

# BMJ Open

## Serum fibrinogen and cardiovascular events in Chinese type 2 diabetic patients with stable coronary artery disease: a prospective observational study

|                               |                                                                                                                                                                                                                                                                                                                                                                                                                                                                                                                                                                                                                                                                                                                                                                                                                                                                                                                                                                                                                                                                                                                                                                                                                                                                                                                                                                                                                                                                                                                                                                                                                                                                                                                                                                                                                                                                                                                                                                                                                                                                                                                                                                                                                                                                                                                                                                                                                                                                                                                                                                                                                                                                                      |
|-------------------------------|--------------------------------------------------------------------------------------------------------------------------------------------------------------------------------------------------------------------------------------------------------------------------------------------------------------------------------------------------------------------------------------------------------------------------------------------------------------------------------------------------------------------------------------------------------------------------------------------------------------------------------------------------------------------------------------------------------------------------------------------------------------------------------------------------------------------------------------------------------------------------------------------------------------------------------------------------------------------------------------------------------------------------------------------------------------------------------------------------------------------------------------------------------------------------------------------------------------------------------------------------------------------------------------------------------------------------------------------------------------------------------------------------------------------------------------------------------------------------------------------------------------------------------------------------------------------------------------------------------------------------------------------------------------------------------------------------------------------------------------------------------------------------------------------------------------------------------------------------------------------------------------------------------------------------------------------------------------------------------------------------------------------------------------------------------------------------------------------------------------------------------------------------------------------------------------------------------------------------------------------------------------------------------------------------------------------------------------------------------------------------------------------------------------------------------------------------------------------------------------------------------------------------------------------------------------------------------------------------------------------------------------------------------------------------------------|
| Journal:                      | <i>BMJ Open</i>                                                                                                                                                                                                                                                                                                                                                                                                                                                                                                                                                                                                                                                                                                                                                                                                                                                                                                                                                                                                                                                                                                                                                                                                                                                                                                                                                                                                                                                                                                                                                                                                                                                                                                                                                                                                                                                                                                                                                                                                                                                                                                                                                                                                                                                                                                                                                                                                                                                                                                                                                                                                                                                                      |
| Manuscript ID                 | bmjopen-2016-015041.R1                                                                                                                                                                                                                                                                                                                                                                                                                                                                                                                                                                                                                                                                                                                                                                                                                                                                                                                                                                                                                                                                                                                                                                                                                                                                                                                                                                                                                                                                                                                                                                                                                                                                                                                                                                                                                                                                                                                                                                                                                                                                                                                                                                                                                                                                                                                                                                                                                                                                                                                                                                                                                                                               |
| Article Type:                 | Research                                                                                                                                                                                                                                                                                                                                                                                                                                                                                                                                                                                                                                                                                                                                                                                                                                                                                                                                                                                                                                                                                                                                                                                                                                                                                                                                                                                                                                                                                                                                                                                                                                                                                                                                                                                                                                                                                                                                                                                                                                                                                                                                                                                                                                                                                                                                                                                                                                                                                                                                                                                                                                                                             |
| Date Submitted by the Author: | 25-Dec-2016                                                                                                                                                                                                                                                                                                                                                                                                                                                                                                                                                                                                                                                                                                                                                                                                                                                                                                                                                                                                                                                                                                                                                                                                                                                                                                                                                                                                                                                                                                                                                                                                                                                                                                                                                                                                                                                                                                                                                                                                                                                                                                                                                                                                                                                                                                                                                                                                                                                                                                                                                                                                                                                                          |
| Complete List of Authors:     | <p>Yang, Sheng-Hua; Fuwai Hospital, National Center for Cardiovascular Diseases, Chinese Academy of Medical Sciences, Peking Union Medical College, Division of Dyslipidemia, State Key Laboratory of Cardiovascular Disease</p> <p>Du, Ying; Fuwai Hospital, National Center for Cardiovascular Diseases, Chinese Academy of Medical Sciences, Peking Union Medical College</p> <p>Zhang, Yan; Fuwai Hospital, National Center for Cardiovascular Diseases, Chinese Academy of Medical Sciences, Peking Union Medical College, Division of Dyslipidemia, State Key Laboratory of Cardiovascular Disease</p> <p>Li, Xiao-Lin; Fuwai Hospital, National Center for Cardiovascular Diseases, Chinese Academy of Medical Sciences, Peking Union Medical College, Division of Dyslipidemia, State Key Laboratory of Cardiovascular Disease</p> <p>Li, Sha; Fuwai Hospital, National Center for Cardiovascular Diseases, Chinese Academy of Medical Sciences, Peking Union Medical College, Division of Dyslipidemia, State Key Laboratory of Cardiovascular Disease</p> <p>Xu, Rui-Xia; Fuwai Hospital, National Center for Cardiovascular Diseases, Chinese Academy of Medical Sciences, Peking Union Medical College, Division of Dyslipidemia, State Key Laboratory of Cardiovascular Disease</p> <p>Zhu, Cheng-Gang ; Fuwai Hospital, National Center for Cardiovascular Diseases, Chinese Academy of Medical Sciences, Peking Union Medical College, Division of Dyslipidemia, State Key Laboratory of Cardiovascular Disease</p> <p>Guo, Yuan-Lin; Fuwai Hospital, National Center for Cardiovascular Diseases, Chinese Academy of Medical Sciences, Peking Union Medical College, Division of Dyslipidemia, State Key Laboratory of Cardiovascular Disease</p> <p>Wu, Na-Qiong; Fuwai Hospital, National Center for Cardiovascular Diseases, Chinese Academy of Medical Sciences, Peking Union Medical College</p> <p>Qing, Ping; Fuwai Hospital, National Center for Cardiovascular Diseases, Chinese Academy of Medical Sciences, Peking Union Medical College, Division of Dyslipidemia, State Key Laboratory of Cardiovascular Disease</p> <p>Gao, Ying; Fuwai Hospital, National Center for Cardiovascular Diseases, Chinese Academy of Medical Sciences, Peking Union Medical College</p> <p>Cui, Chuan-Jue; Fuwai Hospital, National Center for Cardiovascular Diseases, Chinese Academy of Medical Sciences, Peking Union Medical College, Division of Dyslipidemia, State Key Laboratory of Cardiovascular Disease</p> <p>Dong, Qian; Fuwai Hospital, National Center for Cardiovascular Diseases, Chinese Academy of Medical Sciences, Peking Union Medical College</p> |

|                                    |                                                                                                                                                                                                                                                                                                                                                                                                                                                |
|------------------------------------|------------------------------------------------------------------------------------------------------------------------------------------------------------------------------------------------------------------------------------------------------------------------------------------------------------------------------------------------------------------------------------------------------------------------------------------------|
|                                    | Sun, Jing ; Fuwai Hospital, National Center for Cardiovascular Diseases, Chinese Academy of Medical Sciences, Peking Union Medical College, Division of Dyslipidemia, State Key Laboratory of Cardiovascular Disease<br>Li, Jian-Jun; Division of Dyslipidemia, State Key Laboratory of Cardiovascular Disease, Fuwai Hospital, National Center for Cardiovascular Diseases, Chinese Academy of Medical Sciences, Peking Union Medical College |
| <b>Primary Subject Heading</b> :   | Cardiovascular medicine                                                                                                                                                                                                                                                                                                                                                                                                                        |
| <b>Secondary Subject Heading</b> : | Cardiovascular medicine, Diabetes and endocrinology                                                                                                                                                                                                                                                                                                                                                                                            |
| <b>Keywords</b> :                  | Fibrinogen, type 2 diabetes mellitus, coronary artery disease, outcome                                                                                                                                                                                                                                                                                                                                                                         |
|                                    |                                                                                                                                                                                                                                                                                                                                                                                                                                                |

SCHOLARONE™  
Manuscripts

1  
2  
3  
4 **BMJ Open**

2016-11-5

5  
6 **Title:** Serum fibrinogen and cardiovascular events in Chinese type 2 diabetic patients  
7 with stable coronary artery disease: a prospective observational study  
8

9  
10  
11 **Authors:** Sheng-Hua Yang, Ying Du, Yan Zhang, Xiao-Lin Li, Sha Li, Rui-Xia Xu,  
12 Cheng-Gang Zhu, Yuan-Lin Guo, Na-Qiong Wu, Ping Qing, Ying Gao, Chuan-Jue  
13 Cui, Qian Dong, Jing Sun, Jian-Jun Li  
14  
15

16  
17  
18 **Address:** Division of Dyslipidemia, State Key Laboratory of Cardiovascular Disease,  
19 Fuwai Hospital, National Center for Cardiovascular Diseases, Chinese Academy of  
20 Medical Sciences, Peking Union Medical College, BeiLiShi Road 167, Beijing  
21 100037, China  
22  
23  
24

25  
26  
27 **#Correspondence:** Professor Jian-Jun Li, MD, PhD. Division of Dyslipidemia, State  
28 Key Laboratory of Cardiovascular Disease, Fuwai Hospital, National Center for  
29 Cardiovascular Diseases, Chinese Academy of Medical Sciences, Peking Union  
30 Medical College, Beijing 100037, China.  
31  
32

33  
34  
35 **Tel:** 86+10+88396077;  
36

37  
38 **Fax:** 86+10+88396584;  
39

40  
41 **E-mail:** [lijianjun938@126.com](mailto:lijianjun938@126.com)  
42  
43  
44  
45

46 **Word count: 2525**  
47  
48  
49  
50  
51  
52  
53  
54  
55  
56

## ABSTRACT

**Objectives:** The aim of this study was to investigate the association of serum fibrinogen with cardiovascular events (CVE) in Chinese patients with type 2 diabetes mellitus (T2DM) and stable coronary artery disease (CAD).

**Design:** An observational study.

**Setting:** FuWai Hospital in Beijing, China.

**Participants:** A cohort of 1466 T2DM patients with angiographic-proven stable CAD was evaluated.

**Outcome measures:** Baseline serum fibrinogen levels were measured and trisected into “low”, “middle” and “high”. Their association with CVE was explored using Cox proportional hazard models.

**Results:** With 20.2 months (average) follow-up, 44 (3%) were lost to follow-up, and 96 patients developed CVE. Compared with the patients without CVE, the ones who developed CVE had higher levels of fibrinogen. Univariable regression revealed a significant relation of fibrinogen to CVE (hazard ratio [HR] 1.25, 95% confidence interval [CI]: 1.06-1.47,  $P=0.010$ ) per standard deviation increase of fibrinogen at baseline. After adjusting for multiple established cardiovascular disease (CVD) risk factors, the association persisted (HR 1.30, 95% CI: 1.02-1.66,  $P=0.037$ ). Moreover, after adjusting for CVD risk factors, the HRs for middle and high serum fibrinogen concentration, using “low” group as reference, were 1.23 (95% CI: 0.69–2.20) and 2.20 (95% CI: 1.11–3.36,  $P=0.049$ ).

**Conclusions:** We firstly indicated that elevated fibrinogen level was independently associated with increased CVE in Chinese T2DM patients with stable CAD.

**Keywords:** Fibrinogen; type 2 diabetes mellitus; coronary artery disease; outcome



### Strengths and limitations of this study

1. We, for the first time, reported that baseline fibrinogen was associated with cardiovascular events (CVEs) in Chinese type 2 diabetic patients with stable coronary artery disease.
2. The number of CVEs was relatively small and the follow-up duration was relatively short, so further study is needed.
3. We just investigated whether the one-time baseline level of fibrinogen was a predictor of short-term outcome in patients with type 2 diabetic patients with stable coronary artery disease.

For peer review only

## INTRODUCTION

Fibrinogen, as a marker of thrombosis and inflammation, is associated with cardiovascular diseases (CVD). It has been demonstrated that elevated fibrinogen level is significantly associated with intima-media thickness and subclinical atherosclerosis.<sup>1-5</sup> Also, previous study revealed that fibrinogen independently predicted future ischemic stroke risk and incident hypertension.<sup>6-8</sup> What's more, fibrinogen has been well established to be a strong and independent cardiovascular risk factor in general population.<sup>8-12</sup> Data suggested that baseline plasma fibrinogen level could predict cardiovascular events (CVE) in general individuals and nondiabetics.<sup>3,9,10,13</sup>

It is worthy of mentioning that individuals with type 2 diabetes mellitus (T2DM) have higher levels of plasma fibrinogen compared with those without T2DM.<sup>8,14</sup> The most common cause for mortality in patients with diabetes mellitus (DM) is coronary artery disease (CAD). Thereby, it is logically hypothesized that hyperfibrinogenemia could contribute to increase CVE in this disease. However, studies on the role of fibrinogen in cardiovascular outcomes in diabetes are both limited and controversial.<sup>6,15-17</sup>

Based on such situation and combined with a fact that no data is currently available so far with regard to the relationship between fibrinogen and CVE in T2DM patients with stable CAD, we, therefore, performed a prospective observational study of the association of baseline plasma fibrinogen and the risk of cardiovascular events in diabetic patients with stable coronary artery disease.

## Patients and Methods

### Study Population

In the present study, consecutive patients hospitalized in our division were screened between April 2011 and July 2015 for the following inclusion criteria: over the age of 18 years, type 2 diabetes mellitus and angiographic-proven stable coronary artery disease. Exclusion criteria were acute coronary syndrome (ACS), in-hospital cardiac death at first admission in our division, unavailable data of baseline fibrinogen concentration, the existence of any infectious or systematic inflammatory diseases, significant hematologic disorders, thyroid dysfunction, severe liver and/or renal insufficiency and malignant tumors. According to the inclusion and exclusion criteria, a total

1  
2  
3 of 1466 eligible patients were enrolled (**Figure 1**). The study was performed according to the  
4 Declaration of Helsinki, and the hospital ethics review board (Fuwai Hospital & National Center  
5 for Cardiovascular Diseases, Beijing, China) approved the protocol. All the subjects gave written  
6 informed consent.  
7  
8  
9

### 10 11 12 **Biochemical Analysis and Baseline Examination** 13

14 Overnight fasting blood samples were drawn from each patient at admission and centrifuged at  
15 room temperature within 2 hours. As described in our previous studies,<sup>18,19</sup> the plasma levels of  
16 fibrinogen were quantitatively measured by the method of Clauss and a Stagoauto analyzer with  
17 STA Fibrinogen kit (Diagnostic Stago, Taverny, France). Glucose, haemoglobinA1c (HbA1c), uric  
18 acid and lipid profile were determined by standard methods. The concentrations of high-sensitivity  
19 C-reactive protein (hs-CRP) were determined using immunoturbidimetry (Beckmann Assay 360,  
20 Bera, CA, USA).  
21  
22  
23  
24  
25  
26

27 Height and weight were measured, and body mass index (BMI) ( $\text{kg}/\text{m}^2$ ) was calculated.  
28 Diabetes mellitus was defined as a fasting plasma glucose  $\geq 126$  mg/dL (7.0mmol/L) in multiple  
29 determinations, and/or the current use of medication for diabetes. Hypertension was defined as  
30 repeated blood pressure measurements  $\geq 140/90$  mmHg (at least 2 times in different environments)  
31 or currently taking antihypertensive drugs. Stable CAD was defined as typical angina-like chest  
32 pain brought on by exertion and relieved by rest or sublingual nitrates or both, a positive treadmill  
33 exercise test ( $>1$  mm ST-segment depression), and stable obstructive lesion  $>50\%$  in at least 1 of  
34 the 3 major coronary arteries or major branches assessed by at least 2 independent senior  
35 interventional cardiologists who had no knowledge of the patients' clinical characteristics and  
36 biochemical results. Dyslipidemia was considered to be present in patients if they had fasting total  
37 cholesterol (TC)  $\geq 200$  mg/dL or triglyceride (TG)  $\geq 150$  mg/dL.  
38  
39  
40  
41  
42  
43  
44  
45  
46  
47  
48

### 49 **Definition of Events and Follow-up** 50

51 The primary outcomes were CVE. CVE were defined as the cardiac death, stroke, nonfatal  
52 myocardial infarction (MI), post-discharge revascularization (PCI/CABG) due to clinical  
53 deterioration or unstable angina (UA). The follow-up data collection was performed by the trained  
54 nurses or cardiologists who were blinded to the aim of this study by means of standardized  
55  
56  
57  
58  
59  
60

1  
2  
3 telephone interviews at 6-month intervals. Follow-up time was calculated as the number of months  
4 from the enrollment till the last traceable hospital outpatient or inpatient record or telephone  
5 interview before March 2016, and was censored on the date of the first CVE. Death of a  
6 participant was reported by relatives or the general practitioner who treated the participant. Three  
7 experienced physicians who were blinded to any of the study data independently classified the  
8 events.  
9

### 10 11 12 13 14 **Statistical Analysis**

15  
16 Continuous variables were presented as mean  $\pm$  SD or median (25th, 75th percentiles) and  
17 categorical variables as percentages. Fibrinogen levels were trisected into “low” ( $\leq 2.91$  g/L),  
18 “middle” (2.91-3.51 g/L) and “high” ( $\geq 3.51$  g/L). Comparisons of continuous baseline data  
19 between two or more groups were performed with Student t test and ANOVA, respectively, and  $\chi^2$   
20 test was used to compare categorical data. Kruskal-Wallis H test was used for nonnormal variables.  
21 Test for linear trend (Jonckheere–Terpstra test) was performed by assigning median value for each  
22 tertile and treated as continuous variables.  
23  
24  
25  
26  
27

28  
29 Participants who were lost during follow-up were treated as censored observations and not used  
30 for follow-up analysis. Using the Cox proportional hazards model, hazard ratios (HR) of CVE,  
31 with 95% confidence intervals, were calculated using crude models as well as models adjusted for  
32 potential confounding factors. A  $P < 0.05$  for two sided testing was considered statistically  
33 significant. The statistical analysis was performed with SPSS version 19.0 software (SPSS Inc.,  
34 Chicago, IL).  
35  
36  
37  
38  
39  
40

## 41 **RESULTS**

### 42 43 **Baseline Characteristics**

44  
45 The baseline demographic, clinical characteristics, and laboratory findings of the study cohort  
46 classified by outcome status (with cardiovascular events or not) were listed in **Table 1**. Compared  
47 with the patients without CVE, the ones who developed CVE had lower left ventricle ejection  
48 fraction (LVEF) but higher levels of fibrinogen, HbA1c, highly sensitive C-reactive protein and  
49 uric acid. Meanwhile, we found that there is a tendency to higher fasting triglyceride level in CVE  
50 group ( $P = 0.054$ ). Additionally, there is no significant difference in age, BMI, gender, status of  
51 hypertension, smoking status and medical history between the patients with or without CVE.  
52  
53  
54  
55  
56  
57  
58  
59  
60

**Table 1** Characteristics of the study cohort with and without cardiovascular events of myocardial infarction, cardiac death, myocardial revascularization and fatal or nonfatal stroke

|                                           | CVE (n=96)        | No CVE (n=1326)   | <i>p</i>         |
|-------------------------------------------|-------------------|-------------------|------------------|
| Age (years)                               | 58.54 ± 10.65     | 59.29 ± 9.81      | 0.473            |
| Body Mass Index (kg/m <sup>2</sup> )      | 26.32 ± 3.07      | 26.22 ± 3.21      | 0.790            |
| Gender, men, % (n)                        | 70.8 (68)         | 70.7 (938)        | 0.984            |
| Dyslipidemia, % (n)                       | 88.5 (85)         | 80.6 (1068)       | 0.055            |
| Hypertension, % (n)                       | 78.1 (75)         | 72.9 (966)        | 0.265            |
| Current smoking, % (n)                    | 56.3 (54)         | 51.2 (679)        | 0.343            |
| Duration of diabetes (years)              | 10.24 ± 6.66      | 8.64 ± 6.50       | 0.151            |
| Previous PCI, %(n)                        | 22.9 (22)         | 24.0 (318)        | 0.810            |
| Previous CABG, %(n)                       | 1.0 (1)           | 3.4 (45)          | 0.208            |
| Family history of CAD, % (n)              | 17.7 (17)         | 14.8 (195)        | 0.224            |
| Systolic Blood Pressure (mmHg)            | 124.94 ± 14.64    | 127.86 ± 16.41    | 0.117            |
| Diastolic Blood Pressure (mmHg)           | 74.93 ± 9.12      | 77.01 ± 10.17     | 0.071            |
| Left Ventricle Ejection Fraction (%)      | 60.4 ± 10.2       | 63.7 ± 8.0        | <b>&lt;0.001</b> |
| Total Cholesterol (mmol/L)                | 4.10 ± 1.16       | 4.10 ± 1.21       | 0.962            |
| HDL-cholesterol (mmol/L)                  | 0.98 ± 0.28       | 1.03 ± 0.27       | 0.126            |
| LDL-cholesterol (mmol/L)                  | 2.44 ± 0.99       | 2.46 ± 0.96       | 0.827            |
| Triglycerides (mmol/L)                    | 1.79 (1.28, 2.53) | 1.56 (1.18, 2.21) | 0.054            |
| Apo A1 (g/L)                              | 1.36 ± 0.37       | 1.32 ± 0.28       | 0.140            |
| Apo B (g/L)                               | 0.99 ± 0.34       | 0.94 ± 0.33       | 0.113            |
| HbA1c (%)                                 | 7.89 ± 1.54       | 7.50 ± 1.33       | <b>0.007</b>     |
| Glucose (mmol/L)                          | 7.52 ± 2.68       | 7.18 ± 2.28       | 0.155            |
| Highly Sensitive C-reactive Protein, mg/L | 1.83 (1.08, 4.47) | 1.54 (0.77, 3.23) | <b>0.017</b>     |
| Uric acid (umol/L)                        | 368.39 ± 96.44    | 340.26 ± 93.36    | <b>0.005</b>     |
| Fibrinogen (g/L)                          | 3.52 ± 0.85       | 3.30 ± 0.8        | <b>0.015</b>     |
| Medication                                |                   |                   |                  |
| Statin, % (n)                             | 69.8 (67)         | 71.9 (953)        | 0.707            |
| Aspirin, % (n)                            | 88.1 (84)         | 86.7 (1149)       | 0.794            |
| Beta-blocker, % (n)                       | 52.4 (50)         | 48.2 (639)        | 0.601            |
| Calcium Channel Blocker                   | 11.5 (11)         | 20.7 (275)        | 0.166            |
| ACEI/ARB                                  | 30.0 (29)         | 26.5 (351)        | 0.521            |
| OADs, % (n)                               | 48.9 (47)         | 54.3 (720)        | 0.296            |
| Insulin, % (n)                            | 27.1 (26)         | 25.8 (342)        | 0.813            |
| OADs+insulin, % (n)                       | 13.5 (13)         | 19.9 (264)        | 0.215            |

Data are presented as mean ± SD, median (25th, 75th percentiles) or % (n). CVE: cardiovascular events; Apo: apolipoprotein; HbA1c: Glycosylated Hemoglobin, TypeA1C; ACEI/ARB: Angiotensin Converting EnzymeInhibitor / Angiotensin IIReceptor Blocker; OADs, oral anti-diabetic drugs.

**Table 2** compared the baseline cardiovascular risk profiles of the study population, divided into

“low” ( $\geq 2.91$  g/L), “middle” (2.91-3.51 g/L) and “high” ( $\geq 3.51$  g/L) subgroups on the basis of the fibrinogen concentration. The patients with middle and high levels of fibrinogen had higher percentage of CVE, female, and higher levels of hs-CRP, total cholesterol, LDL-C, HbA1c and fasting glucose compared with the “low” group. No significant difference was found in age, BMI, blood pressure and smoking status.

**Table 2.** Baseline characteristics of the cohort of the diabetic patients with stable CAD according to serum fibrinogen levels at baseline

| Variables                    | Fibrinogen Tertiles (g/L)      |                               |                                 | <i>p</i>         |
|------------------------------|--------------------------------|-------------------------------|---------------------------------|------------------|
|                              | Low ( $\leq 2.91$ )<br>(n=476) | Middle (2.91-3.51)<br>(n=476) | High ( $\geq 3.51$ )<br>(n=470) |                  |
| Age (years)                  | 58.65 $\pm$ 9.66               | 59.16 $\pm$ 9.69              | 59.91 $\pm$ 10.22               | 0.142            |
| BMI (kg/m <sup>2</sup> )     | 26.21 $\pm$ 3.08               | 26.18 $\pm$ 2.92              | 26.30 $\pm$ 3.58                | 0.838            |
| Gender, men, % (n)           | 78.4 (373)                     | 68.5 (326)                    | 65.3 (307)                      | <b>&lt;0.001</b> |
| Dyslipidemia, % (n)          | 80.5 (383)                     | 81.1 (385)                    | 81.9 (385)                      | 0.848            |
| Hypertension, % (n)          | 71.4 (340)                     | 72.0 (342)                    | 76.4 (359)                      | 0.170            |
| Current smoking, % (n)       | 53.2 (253)                     | 53.3 (253)                    | 48.3 (227)                      | 0.219            |
| SBP (mmHg)                   | 126.82 $\pm$ 15.45             | 127.57 $\pm$ 17.08            | 127.58 $\pm$ 17.04              | 0.723            |
| DBP (mmHg)                   | 76.60 $\pm$ 10.00              | 77.07 $\pm$ 10.26             | 76.64 $\pm$ 10.15               | 0.731            |
| TC (mmol/L)                  | 3.86 $\pm$ 1.05                | 4.17 $\pm$ 1.17               | 4.27 $\pm$ 1.24                 | <b>&lt;0.001</b> |
| HDL-C (mmol/L)               | 1.02 $\pm$ 0.25                | 1.03 $\pm$ 0.26               | 1.03 $\pm$ 0.30                 | 0.739            |
| LDL-C (mmol/L)               | 2.28 $\pm$ 0.89                | 2.52 $\pm$ 0.94               | 2.60 $\pm$ 1.01                 | <b>&lt;0.001</b> |
| Triglycerides (mmol/L)       | 1.57 (1.12, 2.13)              | 1.60 (1.24, 2.34)             | 1.54 (1.19, 2.17)               | 0.092            |
| HbA1C (%)                    | 7.23 $\pm$ 1.23                | 7.52 $\pm$ 1.28               | 7.84 $\pm$ 1.46                 | <b>&lt;0.001</b> |
| Glucose (mmol/L)             | 6.81 $\pm$ 2.10                | 7.22 $\pm$ .32                | 7.58 $\pm$ 2.43                 | <b>&lt;0.001</b> |
| Hs-CRP, mg/L                 | 0.88 (0.52, 1.45)              | 1.54 (0.82, 2.71)             | 3.64 (1.83, 8.34)               | <b>&lt;0.001</b> |
| Uric acid (umol/L)           | 340.93 $\pm$ 95.56             | 339.06 $\pm$ 86.97            | 346.60 $\pm$ 98.62              | 0.441            |
| CVD events, % (n)            | 5.0 (24)                       | 5.7 (27)                      | 9.6 (45)                        | <b>0.011</b>     |
| Duration of diabetes (years) | 9.03 $\pm$ 6.82                | 8.89 $\pm$ 6.03               | 10.83 $\pm$ 6.83                | 0.356            |
| Fibrinogen (g/L)             | 2.55 $\pm$ 0.31                | 3.21 $\pm$ 0.16               | 4.20 $\pm$ 0.74                 | <b>&lt;0.001</b> |

Data are presented as mean  $\pm$  SD, median (25<sup>th</sup>, 75<sup>th</sup> percentiles) or % (n). CAD, coronary artery disease; BMI, body mass index; SBP, systolic blood pressure; DBP, diastolic blood pressure; TC, total cholesterol; hs-CRP, high-sensitivity C-reactive protein; CVD events: myocardial infarction, cardiac death, myocardial revascularization and fatal or nonfatal stroke.

## Outcomes

The average follow-up time was 20.2 months (range from 0.4 to 49.3). During the follow-up period, 96 patients experienced cardiovascular event: 19 (19.8%) nonfatal myocardial infarctions

(MIs), 55 (57.3%) myocardial revascularization procedures (PCI or CABG) because of clinical deterioration, 15 (15.6%) strokes and 7 (7.3%) cardiac deaths. We calculated the number of new events per 100 person years, namely, 2.0047/100 per 100 person years. Patients suffered ACS and underwent revascularization procedures were assigned once in the analysis. Of the 1466 diabetic patients with stable coronary artery disease, 44 (3%) were lost to follow-up. Therefore, the data of 1422 participants were used for follow-up analysis.

### Hazard Ratios of Fibrinogen for Study Outcomes

Univariable regression revealed significant association between serum fibrinogen level at baseline and CVE (HR=1.25, 95% confidence interval [CI]: 1.06-1.47,  $P=0.010$ ) per standard deviation (SD) increase of serum fibrinogen at baseline. After adjusting for multiple established CVD risk factors, the association persisted (HR=1.30, 95% CI: 1.02-1.66,  $P=0.037$ ) (Table 3). Unadjusted HR for developing a CVE was significantly increased in the “high” group compared with the “low” group at baseline, and similar results were also found after adjusting for sex and age (Figure 2). After adjusting for established CVD risk factors, the HR for middle and high serum fibrinogen concentration, using “low” group as reference, were 1.23 (95% CI: 0.69–2.20) and 2.20 (95% CI: 1.11–3.36) ( $P$  for trend 0.049) (Table 3).

**Table 3** Hazard Ratios for Cardiovascular Disease Events Association with the Plasma Levels of Fibrinogen (low, middle and high)

|         | 1 SD fibrinogen increase |                   |                   | $p$           |
|---------|--------------------------|-------------------|-------------------|---------------|
| Crude   | 1.25 (1.06, 1.48)        |                   |                   | 0.010         |
| Model 1 | 1.26 (1.06, 1.49)        |                   |                   | 0.008         |
| Model 2 | 1.25 (1.05, 1.49)        |                   |                   | 0.013         |
| Model 3 | 1.36 (1.07, 1.72)        |                   |                   | 0.011         |
| Model 4 | 1.34 (1.05, 1.71)        |                   |                   | 0.017         |
| Model 5 | 1.30 (1.02, 1.66)        |                   |                   | 0.037         |
|         | Hazard Ratio (95% CI)    |                   |                   | $p$ for trend |
| Model   | Low<br>(Reference)       | Middle            | High              |               |
| Crude   | 1.00                     | 1.10 (0.64, 1.91) | 1.99 (1.21, 3.26) | 0.008         |
| Model 1 | 1.00                     | 1.10 (0.64, 1.92) | 2.00 (1.22, 3.30) | 0.007         |
| Model 2 | 1.00                     | 1.09 (0.63, 1.89) | 1.97 (1.19, 3.26) | 0.009         |
| Model 3 | 1.00                     | 1.14 (0.65, 2.00) | 2.15 (1.22, 3.80) | 0.012         |
| Model 4 | 1.00                     | 1.23 (0.69, 2.19) | 2.10 (1.16, 3.80) | 0.031         |

|         |      |                   |                   |       |
|---------|------|-------------------|-------------------|-------|
| Model 5 | 1.00 | 1.23 (0.69, 2.20) | 2.02 (1.11, 3.68) | 0.049 |
|---------|------|-------------------|-------------------|-------|

Model 1: adjusted for sex, and age; Model 2: Model 1+ total cholesterol, high-density lipoprotein cholesterol, low-density lipoprotein cholesterol, hypertension, and smoking; Model 3: Model 2+ triglycerides, hs-CRP, and HbA1c; Model 4: Model 3+uric acid, body mass index, and family history of CVD, and Model 5: Model 4+Left Ventricle Ejection Fraction. CVD, cardiovascular disease; SD, standard deviation

## DISCUSSION

In this prospective observational study in single center with a relative large sample size, we, for the first time, found that baseline fibrinogen concentration was independently associated with CVE in Chinese type 2 diabetic patients with stable CAD. Although the study might be limited by follow-up duration, the present data provided novel and important information with regard to the key issue whether the baseline fibrinogen concentration can be a marker for predicting the clinical outcomes in T2DM patients with stable CAD.

Sufficient evidence has demonstrated that plasma fibrinogen is a risk factor for cardiovascular disease in general population,<sup>3,6,8-10</sup> but the role of fibrinogen in diabetes remains controversial. Some previous studies demonstrated that hyperfibrinogenemia was an important risk factor for vascular complications in diabetes.<sup>20</sup> For instance, a prospective cohort of 2329 patients with type 1 diabetes revealed that fibrinogen was significant and independent predictor of coronary heart disease in men.<sup>15</sup> Moreover, increased fibrinogen level was shown to be associated with diabetic nephropathy in type 2 diabetics<sup>21,22</sup> and in type 1 diabetics.<sup>15,23,24</sup> Gargano Heart Study (GHS) showed that fibrinogen was a predictor of incident major CVE after adjusting for sex, age, smoking habit and BMI status in diabetics.<sup>25</sup> In parallel, Bruno et al reported that fibrinogen had an independent predictive effect on cardiovascular mortality in T2DM.<sup>26</sup> Furthermore, Stehouwer et al. revealed that baseline fibrinogen concentrations were strongly and independently associated with risk of all-cause death in type 2 diabetics.<sup>27</sup> On the contrary, some studies reported that the association between fibrinogen and incident CAD in patients with T2DM was non-significant via multivariable analyses.<sup>17,28</sup> As we well known, the major cause of death in T2DM is macrovascular complications, especially CAD. Hence, in the present study, we enrolled angiographic-proven CAD patients with T2DM and tried to examine the role of fibrinogen in such a study population of type 2 diabetic patients with CAD. We found that elevated fibrinogen level



1  
2  
3 at baseline was associated with increased CVE in T2DM patients with stable CAD. Additionally,  
4 we also found that fibrinogen was higher among those patients who developed a cardiovascular  
5 event compared with those who did not, which is in agreement with previous studies.<sup>9,13</sup> To our  
6 knowledge, this is the first time to investigate the relationship between fibrinogen and CVE in  
7 T2DM patients with stable CAD.  
8  
9

10  
11  
12 Recently the ADVANCE study (Action in Diabetes and Vascular Disease: Preterax and  
13 Diamicron Modified Release Controlled Evaluation) reported that baseline fibrinogen level was  
14 associated with an increased risk of macrovascular events and death in univariate analysis, but  
15 after further adjustment, fibrinogen was not an independent predictor of macrovascular.<sup>17</sup> In the  
16 present study, our finding is not consistent with the ADVANCE study, and we speculate that some  
17 reasons could explain it. Firstly, the inclusive criteria are different: we chose the patients with  
18 T2DM and stable CAD, while the ADVANCE study chose the subjects with T2DM and a history  
19 of CVD (stroke, myocardial infarction, transient ischemic attack, unstable angina, coronary or  
20 peripheral revascularization, amputation, macroalbuminuria, proliferative retinopathy or  
21 photocoagulation, macular edema, or blindness in one eye) or one or more additional  
22 cardiovascular risk factors. Secondly, despite the patients from many countries in the ADVANCE  
23 study, Chinese and Indians were excluded. Actually, there are ethnic differences in fibrinogen  
24 levels.<sup>29-32</sup> Thus, whether the results also persist in Chinese is undetermined. Finally, the  
25 definitions of outcomes are different. In ADVANCE study, major macrovascular events were  
26 cardiovascular death, nonfatal myocardial infarction, or nonfatal stroke, while our cardiovascular  
27 events were defined as cardiac death, stroke, nonfatal myocardial infarction (MI), post-discharge  
28 revascularization (PCI/CABG) due to clinical deterioration or unstable angina (UA). Additionally,  
29 our previous cross-sectional study has revealed that plasma fibrinogen is associated with severity  
30 of coronary artery disease evaluated using Gensini score in diabetic patients,<sup>19</sup> which partly  
31 supports our present finding. Furthermore, in the present study, we found that 3.515(g/L) is a  
32 cut-off value of fibrinogen to predict CVEs in our cohort, which is consistent with previous  
33 study.<sup>33</sup>  
34  
35  
36  
37  
38  
39  
40  
41  
42  
43  
44  
45  
46  
47  
48  
49  
50  
51

52 There were several limitations of the present study. Firstly, the number of events is relatively  
53 small to assess the prognostic value of fibrinogen. The conclusion needs to be testified by  
54 large-scale study in the future. Secondly, the follow-up duration was relatively short and longer  
55  
56  
57  
58  
59

1  
2  
3 follow-up will be required. Thirdly, this sample population was collected prospectively from a  
4 single center in China. Fibrinogen varies in race,<sup>29</sup> so we do not know if our results would apply to  
5 other ethnic groups and studies from multiple centers are needed to test our finding. Finally, we  
6 just collected one-time baseline level of fibrinogen.  
7  
8  
9

10 In conclusion, we found that fibrinogen was associated with cardiovascular events in patients  
11 with type 2 diabetes with stable CAD in Chinese population. Further studies are required to clarify  
12 the issue completely.  
13  
14

15  
16 **Contributors** S-H Y analyzed the data and drafted the manuscript. J-J L planned, designed the  
17 study, participated in fundraising and corrected the final version. YD, YZ, X-L L and SL  
18 participated in collecting data and interpreted the results. R-X X, C-G Z, Y-L G and N-Q W  
19 participated in the study design, interpretation of the results and manuscript review. PQ, YG, C-J  
20 C and QD participated in collecting data and reviewing manuscript. All authors read and have  
21 approved the final manuscript.  
22  
23  
24  
25  
26  
27  
28  
29

30  
31 **Funding** This work was partially supported by the National Natural Science Foundation of China  
32 (81070171, 81241121), the Specialized Research Fund for the Doctoral Program of Higher  
33 Education of China (20111106110013), the Capital Special Foundation of Clinical Application  
34 Research (Z121107001012015), the Capital Health Development Fund (2011400302), and the  
35 Beijing Natural Science Foundation (7131014) awarded to Dr. Jian-Jun Li, MD, PhD.  
36  
37  
38  
39

40 **Competing interests** The authors declare that they have no completing interests.  
41

42 **Patient consent** Obtained.  
43  
44

45 **Ethics approval** The study was performed according to the Declaration of Helsinki, and the  
46 hospital ethics review board (Fuwai Hospital & National Center for Cardiovascular Diseases,  
47 Beijing, China) approved the protocol.  
48  
49

50  
51 **Data sharing statement** The technical appendix, statistical code and data set are available from  
52 the corresponding author.  
53  
54  
55  
56

## REFERENCES

1. Sabeti S, Exner M, Mlekusch W, *et al.* Prognostic impact of fibrinogen in carotid atherosclerosis: nonspecific indicator of inflammation or independent predictor of disease progression? *Stroke* 2005;36:1400-4.
2. Green D, Foiles N, Chan C, *et al.* Elevated fibrinogen levels and subsequent subclinical atherosclerosis: the CARDIA Study. *Atherosclerosis* 2009;202:623-31.
3. De Luca G, Verdoia M, Cassetti E, *et al.* High fibrinogen level is an independent predictor of presence and extent of coronary artery disease among Italian population. *J Thromb Thrombolysis* 2011;31:458-63.
4. Temelkova-Kurktschiev T, Koehler C, Henkel E, *et al.* Leukocyte count and fibrinogen are associated with carotid and femoral intima-media thickness in a risk population for diabetes. *Cardiovasc Res* 2002;56:277-83.
5. Willeit P, Thompson SG, Agewall S, *et al.* Inflammatory markers and extent and progression of early atherosclerosis: Meta-analysis of individual-participant-data from 20 prospective studies of the PROG-IMT collaboration. *Eur J Prev Cardiol* 2016;23:194-205.
6. Chuang SY, Bai CH, Chen WH, *et al.* Fibrinogen Independently Predicts the Development of Ischemic Stroke in a Taiwanese Population: CVDFACTS Study. *Stroke* 2009;40:1578-84.
7. Shankar A, Wang JJ, Rohtchina E, *et al.* Positive association between plasma fibrinogen level and incident hypertension among men: population-based cohort study. *Hypertension* 2006;48:1043-9.
8. Danesh J, Lewington S, Thompson SG, *et al.* Plasma fibrinogen level and the risk of major cardiovascular diseases and nonvascular mortality: an individual participant meta-analysis. *JAMA* 2005;294:1799-809.
9. Sinning JM, Bickel C, Messow CM, *et al.* Impact of C-reactive protein and fibrinogen on cardiovascular prognosis in patients with stable angina pectoris: the AtheroGene study. *Eur Heart J* 2006;27:2962-8.
10. Collaboration TERF. C-Reactive Protein, Fibrinogen, and Cardiovascular Disease Prediction. *N Engl J Med* 2012;367:1310-20.
11. Park CS, Ihm S-H, Yoo K-D, *et al.* Relation Between C-Reactive Protein, Homocysteine Levels, Fibrinogen, and Lipoprotein Levels and Leukocyte and Platelet Counts, and 10-Year Risk for Cardiovascular Disease Among Healthy Adults in the USA. *Am J Cardiol* 2010;105:1284-88.
12. Danesh J, Collins R, Appleby P, *et al.* Association of fibrinogen, C-reactive protein, albumin, or leukocyte count with coronary heart disease: meta-analyses of prospective studies. *JAMA* 1998;279:1477-82.
13. Luc G. C-Reactive Protein, Interleukin-6, and Fibrinogen as Predictors of Coronary Heart Disease: The PRIME Study. *Arterioscler Thromb Vasc Biol* 2003;23:1255-61.
14. Barazzoni R, Zanetti M, Davanzo G, *et al.* Increased fibrinogen production in type 2 diabetic patients without detectable vascular complications: correlation with plasma glucagon concentrations. *J Clin Endocrinol Metab* 2000;85:3121-5.
15. Soedamah-Muthu SS, Chaturvedi N, Pickup JC, *et al.* Relationship between plasma sialic acid and fibrinogen concentration and incident micro- and macrovascular complications in type 1 diabetes. The EURODIAB Prospective Complications Study (PCS). *Diabetologia*

- 2008;51:493-501.
16. Engstrom G, Stavenow L, Hedblad B, *et al.* Inflammation-sensitive plasma proteins, diabetes, and mortality and incidence of myocardial infarction and stroke: a population-based study. *Diabetes* 2003;52:442-7.
  17. Lowe G, Woodward M, Hillis G, *et al.* Circulating inflammatory markers and the risk of vascular complications and mortality in people with type 2 diabetes and cardiovascular disease or risk factors: the ADVANCE study. *Diabetes* 2014;63:1115-23.
  18. Zhang Y, Zhu C-G, Xu R-X, *et al.* Relation of circulating PCSK9 concentration to fibrinogen in patients with stable coronary artery disease. *J Clin Lipidol* 2014;8:494-500.
  19. Hong L-F, Li X-L, Luo S-H, *et al.* Association of Fibrinogen with Severity of Stable Coronary Artery Disease in Patients with Type 2 Diabetic Mellitus. *Dis Markers* 2014;2014:1-8.
  20. Ganda OP, Arkin CF. Hyperfibrinogenemia. An important risk factor for vascular complications in diabetes. *Diabetes Care* 1992;15:1245-50.
  21. Tessari P, Kiwanuka E, Barazzoni R, *et al.* Diabetic nephropathy is associated with increased albumin and fibrinogen production in patients with type 2 diabetes. *Diabetologia* 2006;49:1955-61.
  22. Azad N, Agrawal L, Emanuele NV, *et al.* Association of PAI-1 and fibrinogen with diabetic retinopathy in the Veterans Affairs Diabetes Trial (VADT). *Diabetes Care* 2014;37:501-6.
  23. Klein RL, Hunter SJ, Jenkins AJ, *et al.* Fibrinogen is a marker for nephropathy and peripheral vascular disease in type 1 diabetes: studies of plasma fibrinogen and fibrinogen gene polymorphism in the DCCT/EDIC cohort. *Diabetes Care* 2003;26:1439-48.
  24. Polat SB, Ugurlu N, Yulek F, *et al.* Evaluation of serum fibrinogen, plasminogen, alpha2-anti-plasmin, and plasminogen activator inhibitor levels (PAI) and their correlation with presence of retinopathy in patients with type 1 DM. *J Diabetes Res* 2014;2014:317292.
  25. Pacilli A, De Cosmo S, Trischitta V, *et al.* Role of relationship between HbA1c, fibrinogen and HDL-cholesterol on cardiovascular disease in patients with type 2 diabetes mellitus. *Atherosclerosis* 2013;228:247-8.
  26. Bruno G, Merletti F, Biggeri A, *et al.* Fibrinogen and AER are major independent predictors of 11-year cardiovascular mortality in type 2 diabetes: the Casale Monferrato Study. *Diabetologia* 2005;48:427-34.
  27. Stehouwer CD, Gall MA, Twisk JW, *et al.* Increased urinary albumin excretion, endothelial dysfunction, and chronic low-grade inflammation in type 2 diabetes: progressive, interrelated, and independently associated with risk of death. *Diabetes* 2002;51:1157-65.
  28. Saito I, Folsom AR, Brancati FL, *et al.* Nontraditional risk factors for coronary heart disease incidence among persons with diabetes: the Atherosclerosis Risk in Communities (ARIC) Study. *Ann Intern Med* 2000;133:81-91.
  29. Cook DG, Cappuccio FP, Atkinson RW, *et al.* Ethnic differences in fibrinogen levels: the role of environmental factors and the beta-fibrinogen gene. *Am J Epidemiol* 2001;153:799-806.
  30. Albert MA. Inflammatory biomarkers, race/ethnicity and cardiovascular disease. *Nutr Rev* 2007;65:S234-8.
  31. Albert MA, Glynn RJ, Buring JE, *et al.* Relation between soluble intercellular adhesion molecule-1, homocysteine, and fibrinogen levels and race/ethnicity in women without cardiovascular disease. *Am J Cardiol* 2007;99:1246-51.
  32. Albert MA, Pare G, Morris A, *et al.* Candidate genetic variants in the fibrinogen,

1  
2  
3 methylenetetrahydrofolate reductase, and intercellular adhesion molecule-1 genes and  
4 plasma levels of fibrinogen, homocysteine, and intercellular adhesion molecule-1 among  
5 various race/ethnic groups: data from the Women's Genome Health Study. *Am Heart J*  
6 2009;157:777-83.e1.  
7

- 8 33. Zhang Y, Zhu CG, Guo YL, *et al.* Higher fibrinogen level is independently linked with the  
9 presence and severity of new-onset coronary atherosclerosis among Han Chinese population.  
10 *PLoS One* 2014;9:e113460.  
11  
12  
13  
14  
15  
16

## 17 **Figure legends**

18  
19  
20 Figure 1 Flow chart of the study. CAD, coronary artery disease.

21 Figure 2 Unadjusted (A) and adjusted by sex and age (B) cumulative hazard of cardiovascular  
22 events based on the levels of fibrinogen (low, middle and high).  
23  
24  
25  
26  
27  
28  
29  
30  
31  
32  
33  
34  
35  
36  
37  
38  
39  
40  
41  
42  
43  
44  
45  
46  
47  
48  
49  
50  
51  
52  
53  
54  
55  
56  
57  
58  
59  
60

1  
2  
3  
4  
5  
6  
7  
8  
9  
10  
11  
12  
13  
14  
15  
16  
17  
18  
19  
20  
21  
22  
23  
24  
25  
26  
27  
28  
29  
30  
31  
32  
33  
34  
35  
36  
37  
38  
39  
40  
41  
42  
43  
44  
45  
46  
47  
48  
49  
50  
51  
52  
53  
54  
55  
56  
57  
58  
59  
60

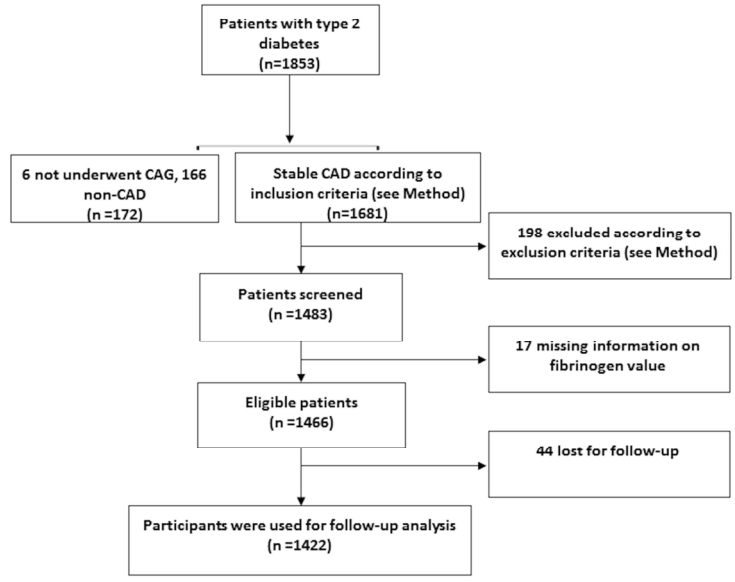

Figure 1 Flow chart of the study. CAD, coronary artery disease.

63x47mm (600 x 600 DPI)

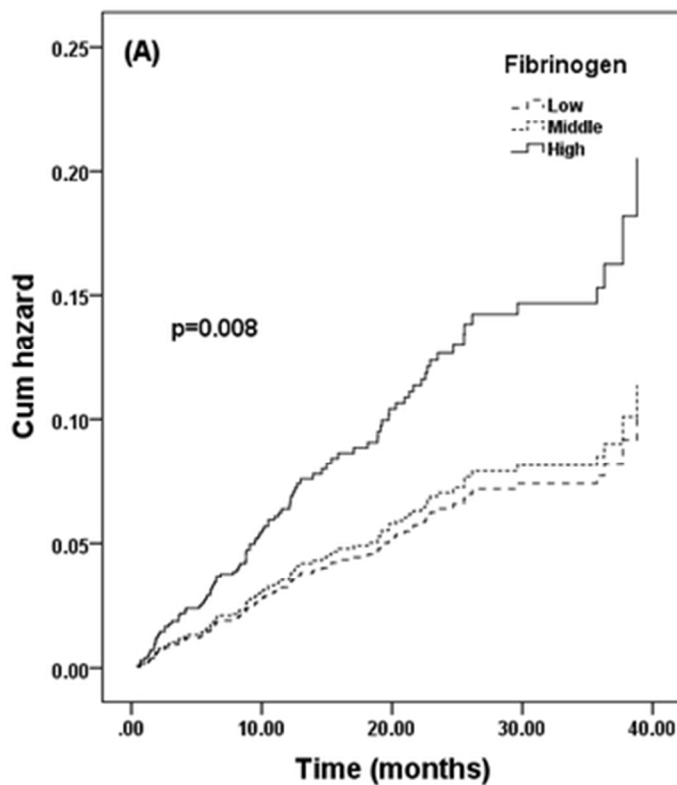

Figure 2 Unadjusted (A) and adjusted by sex and age (B) cumulative hazard of cardiovascular events based on the levels of fibrinogen (low, middle and high).

39x33mm (300 x 300 DPI)

Only

1  
2  
3  
4  
5  
6  
7  
8  
9  
10  
11  
12  
13  
14  
15  
16  
17  
18  
19  
20  
21  
22  
23  
24  
25  
26  
27  
28  
29  
30  
31  
32  
33  
34  
35  
36  
37  
38  
39  
40  
41  
42  
43  
44  
45  
46  
47  
48  
49  
50  
51  
52  
53  
54  
55  
56  
57  
58  
59  
60

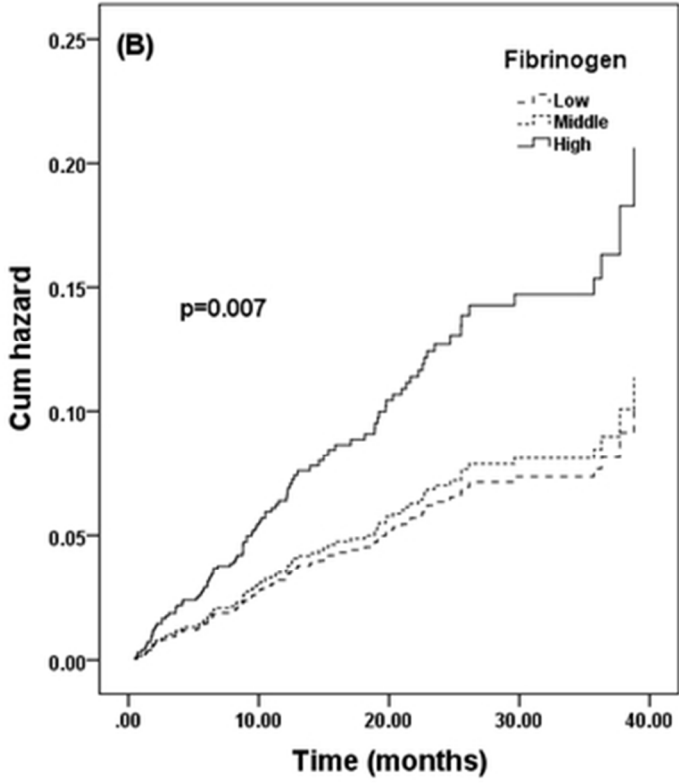

Figure 2 Unadjusted (A) and adjusted by sex and age (B) cumulative hazard of cardiovascular events based on the levels of fibrinogen (low, middle and high).

39x33mm (300 x 300 DPI)

Only



## STROBE Statement—checklist of items that should be included in reports of observational studies

|                              | Item No | Recommendation                                                                                                                                                                                                                                                                                                                                                                                                                                                                                                           | Page number      |
|------------------------------|---------|--------------------------------------------------------------------------------------------------------------------------------------------------------------------------------------------------------------------------------------------------------------------------------------------------------------------------------------------------------------------------------------------------------------------------------------------------------------------------------------------------------------------------|------------------|
| <b>Title and abstract</b>    | 1       | (a) Indicate the study's design with a commonly used term in the title or the abstract                                                                                                                                                                                                                                                                                                                                                                                                                                   | 1                |
|                              |         | (b) Provide in the abstract an informative and balanced summary of what was done and what was found                                                                                                                                                                                                                                                                                                                                                                                                                      | 2                |
| <b>Introduction</b>          |         |                                                                                                                                                                                                                                                                                                                                                                                                                                                                                                                          |                  |
| Background/rationale         | 2       | Explain the scientific background and rationale for the investigation being reported                                                                                                                                                                                                                                                                                                                                                                                                                                     | 3                |
| Objectives                   | 3       | State specific objectives, including any prespecified hypotheses                                                                                                                                                                                                                                                                                                                                                                                                                                                         | 3                |
| <b>Methods</b>               |         |                                                                                                                                                                                                                                                                                                                                                                                                                                                                                                                          |                  |
| Study design                 | 4       | Present key elements of study design early in the paper                                                                                                                                                                                                                                                                                                                                                                                                                                                                  | 3                |
| Setting                      | 5       | Describe the setting, locations, and relevant dates, including periods of recruitment, exposure, follow-up, and data collection                                                                                                                                                                                                                                                                                                                                                                                          | 3,4              |
| Participants                 | 6       | (a) <i>Cohort study</i> —Give the eligibility criteria, and the sources and methods of selection of participants. Describe methods of follow-up<br><i>Case-control study</i> —Give the eligibility criteria, and the sources and methods of case ascertainment and control selection. Give the rationale for the choice of cases and controls<br><i>Cross-sectional study</i> —Give the eligibility criteria, and the sources and methods of selection of participants                                                   | 3                |
|                              |         | (b) <i>Cohort study</i> —For matched studies, give matching criteria and number of exposed and unexposed<br><i>Case-control study</i> —For matched studies, give matching criteria and the number of controls per case                                                                                                                                                                                                                                                                                                   | 3                |
| Variables                    | 7       | Clearly define all outcomes, exposures, predictors, potential confounders, and effect modifiers. Give diagnostic criteria, if applicable                                                                                                                                                                                                                                                                                                                                                                                 | 4                |
| Data sources/<br>measurement | 8*      | For each variable of interest, give sources of data and details of methods of assessment (measurement). Describe comparability of assessment methods if there is more than one group                                                                                                                                                                                                                                                                                                                                     | 4                |
| Bias                         | 9       | Describe any efforts to address potential sources of bias                                                                                                                                                                                                                                                                                                                                                                                                                                                                |                  |
| Study size                   | 10      | Explain how the study size was arrived at                                                                                                                                                                                                                                                                                                                                                                                                                                                                                | 3, 5             |
| Quantitative variables       | 11      | Explain how quantitative variables were handled in the analyses. If applicable, describe which groupings were chosen and why                                                                                                                                                                                                                                                                                                                                                                                             | 5                |
| Statistical methods          | 12      | (a) Describe all statistical methods, including those used to control for confounding<br>(b) Describe any methods used to examine subgroups and interactions<br>(c) Explain how missing data were addressed<br>(d) <i>Cohort study</i> —If applicable, explain how loss to follow-up was addressed<br><i>Case-control study</i> —If applicable, explain how matching of cases and controls was addressed<br><i>Cross-sectional study</i> —If applicable, describe analytical methods taking account of sampling strategy | 5<br>5<br>4<br>4 |
|                              |         | (e) Describe any sensitivity analyses                                                                                                                                                                                                                                                                                                                                                                                                                                                                                    | 4                |

Continued on next page

1  
2  
3  
4  
5  
6  
7  
8  
9  
10  
11  
12  
13  
14  
15  
16  
17  
18  
19  
20  
21  
22  
23  
24  
25  
26  
27  
28  
29  
30  
31  
32  
33  
34  
35  
36  
37  
38  
39  
40  
41  
42  
43  
44  
45  
46  
47  
48  
49  
50  
51  
52  
53  
54  
55  
56  
57  
58  
59  
60

| <b>Results</b>           |     |                                                                                                                                                                                                                                                                                                                                                                                                               |                   |
|--------------------------|-----|---------------------------------------------------------------------------------------------------------------------------------------------------------------------------------------------------------------------------------------------------------------------------------------------------------------------------------------------------------------------------------------------------------------|-------------------|
| Participants             | 13* | (a) Report numbers of individuals at each stage of study—eg numbers potentially eligible, examined for eligibility, confirmed eligible, included in the study, completing follow-up, and analysed<br>(b) Give reasons for non-participation at each stage<br>(c) Consider use of a flow diagram                                                                                                               | 4                 |
| Descriptive data         | 14* | (a) Give characteristics of study participants (eg demographic, clinical, social) and information on exposures and potential confounders<br>(b) Indicate number of participants with missing data for each variable of interest<br>(c) <i>Cohort study</i> —Summarise follow-up time (eg, average and total amount)                                                                                           | 7                 |
| Outcome data             | 15* | <i>Cohort study</i> —Report numbers of outcome events or summary measures over time<br><i>Case-control study</i> —Report numbers in each exposure category, or summary measures of exposure<br><i>Cross-sectional study</i> —Report numbers of outcome events or summary measures                                                                                                                             | 7                 |
| Main results             | 16  | (a) Give unadjusted estimates and, if applicable, confounder-adjusted estimates and their precision (eg, 95% confidence interval). Make clear which confounders were adjusted for and why they were included<br>(b) Report category boundaries when continuous variables were categorized<br>(c) If relevant, consider translating estimates of relative risk into absolute risk for a meaningful time period | 6-8<br>6-8<br>6-8 |
| Other analyses           | 17  | Report other analyses done—eg analyses of subgroups and interactions, and sensitivity analyses                                                                                                                                                                                                                                                                                                                | 7,8               |
| <b>Discussion</b>        |     |                                                                                                                                                                                                                                                                                                                                                                                                               |                   |
| Key results              | 18  | Summarise key results with reference to study objectives                                                                                                                                                                                                                                                                                                                                                      | 8,9               |
| Limitations              | 19  | Discuss limitations of the study, taking into account sources of potential bias or imprecision. Discuss both direction and magnitude of any potential bias                                                                                                                                                                                                                                                    | 10                |
| Interpretation           | 20  | Give a cautious overall interpretation of results considering objectives, limitations, multiplicity of analyses, results from similar studies, and other relevant evidence                                                                                                                                                                                                                                    | 9,10              |
| Generalisability         | 21  | Discuss the generalisability (external validity) of the study results                                                                                                                                                                                                                                                                                                                                         | 10                |
| <b>Other information</b> |     |                                                                                                                                                                                                                                                                                                                                                                                                               |                   |
| Funding                  | 22  | Give the source of funding and the role of the funders for the present study and, if applicable, for the original study on which the present article is based                                                                                                                                                                                                                                                 | 10,11             |

\*Give information separately for cases and controls in case-control studies and, if applicable, for exposed and unexposed groups in cohort and cross-sectional studies.

**Note:** An Explanation and Elaboration article discusses each checklist item and gives methodological background and published examples of transparent reporting. The STROBE checklist is best used in conjunction with this article (freely available on the Web sites of PLoS Medicine at <http://www.plosmedicine.org/>, Annals of Internal Medicine at <http://www.annals.org/>, and Epidemiology at <http://www.epidem.com/>). Information on the STROBE Initiative is available at [www.strobe-statement.org](http://www.strobe-statement.org).

# BMJ Open

## Serum fibrinogen and cardiovascular events in Chinese type 2 diabetic patients with stable coronary artery disease: a prospective observational study

|                               |                                                                                                                                                                                                                                                                                                                                                                                                                                                                                                                                                                                                                                                                                                                                                                                                                                                                                                                                                                                                                                                                                                                                                                                                                                                                                                                                                                                                                                                                                                                                                                                                                                                                                                                                                                                                                                                                                                                                                                                                                                                                                                                                                                                                                                                                                                                                                                                                                                                                                                                                                                                                                                                                                      |
|-------------------------------|--------------------------------------------------------------------------------------------------------------------------------------------------------------------------------------------------------------------------------------------------------------------------------------------------------------------------------------------------------------------------------------------------------------------------------------------------------------------------------------------------------------------------------------------------------------------------------------------------------------------------------------------------------------------------------------------------------------------------------------------------------------------------------------------------------------------------------------------------------------------------------------------------------------------------------------------------------------------------------------------------------------------------------------------------------------------------------------------------------------------------------------------------------------------------------------------------------------------------------------------------------------------------------------------------------------------------------------------------------------------------------------------------------------------------------------------------------------------------------------------------------------------------------------------------------------------------------------------------------------------------------------------------------------------------------------------------------------------------------------------------------------------------------------------------------------------------------------------------------------------------------------------------------------------------------------------------------------------------------------------------------------------------------------------------------------------------------------------------------------------------------------------------------------------------------------------------------------------------------------------------------------------------------------------------------------------------------------------------------------------------------------------------------------------------------------------------------------------------------------------------------------------------------------------------------------------------------------------------------------------------------------------------------------------------------------|
| Journal:                      | <i>BMJ Open</i>                                                                                                                                                                                                                                                                                                                                                                                                                                                                                                                                                                                                                                                                                                                                                                                                                                                                                                                                                                                                                                                                                                                                                                                                                                                                                                                                                                                                                                                                                                                                                                                                                                                                                                                                                                                                                                                                                                                                                                                                                                                                                                                                                                                                                                                                                                                                                                                                                                                                                                                                                                                                                                                                      |
| Manuscript ID                 | bmjopen-2016-015041.R2                                                                                                                                                                                                                                                                                                                                                                                                                                                                                                                                                                                                                                                                                                                                                                                                                                                                                                                                                                                                                                                                                                                                                                                                                                                                                                                                                                                                                                                                                                                                                                                                                                                                                                                                                                                                                                                                                                                                                                                                                                                                                                                                                                                                                                                                                                                                                                                                                                                                                                                                                                                                                                                               |
| Article Type:                 | Research                                                                                                                                                                                                                                                                                                                                                                                                                                                                                                                                                                                                                                                                                                                                                                                                                                                                                                                                                                                                                                                                                                                                                                                                                                                                                                                                                                                                                                                                                                                                                                                                                                                                                                                                                                                                                                                                                                                                                                                                                                                                                                                                                                                                                                                                                                                                                                                                                                                                                                                                                                                                                                                                             |
| Date Submitted by the Author: | 06-Apr-2017                                                                                                                                                                                                                                                                                                                                                                                                                                                                                                                                                                                                                                                                                                                                                                                                                                                                                                                                                                                                                                                                                                                                                                                                                                                                                                                                                                                                                                                                                                                                                                                                                                                                                                                                                                                                                                                                                                                                                                                                                                                                                                                                                                                                                                                                                                                                                                                                                                                                                                                                                                                                                                                                          |
| Complete List of Authors:     | <p>Yang, Sheng-Hua; Fuwai Hospital, National Center for Cardiovascular Diseases, Chinese Academy of Medical Sciences, Peking Union Medical College, Division of Dyslipidemia, State Key Laboratory of Cardiovascular Disease</p> <p>Du, Ying; Fuwai Hospital, National Center for Cardiovascular Diseases, Chinese Academy of Medical Sciences, Peking Union Medical College</p> <p>Zhang, Yan; Fuwai Hospital, National Center for Cardiovascular Diseases, Chinese Academy of Medical Sciences, Peking Union Medical College, Division of Dyslipidemia, State Key Laboratory of Cardiovascular Disease</p> <p>Li, Xiao-Lin; Fuwai Hospital, National Center for Cardiovascular Diseases, Chinese Academy of Medical Sciences, Peking Union Medical College, Division of Dyslipidemia, State Key Laboratory of Cardiovascular Disease</p> <p>Li, Sha; Fuwai Hospital, National Center for Cardiovascular Diseases, Chinese Academy of Medical Sciences, Peking Union Medical College, Division of Dyslipidemia, State Key Laboratory of Cardiovascular Disease</p> <p>Xu, Rui-Xia; Fuwai Hospital, National Center for Cardiovascular Diseases, Chinese Academy of Medical Sciences, Peking Union Medical College, Division of Dyslipidemia, State Key Laboratory of Cardiovascular Disease</p> <p>Zhu, Cheng-Gang ; Fuwai Hospital, National Center for Cardiovascular Diseases, Chinese Academy of Medical Sciences, Peking Union Medical College, Division of Dyslipidemia, State Key Laboratory of Cardiovascular Disease</p> <p>Guo, Yuan-Lin; Fuwai Hospital, National Center for Cardiovascular Diseases, Chinese Academy of Medical Sciences, Peking Union Medical College, Division of Dyslipidemia, State Key Laboratory of Cardiovascular Disease</p> <p>Wu, Na-Qiong; Fuwai Hospital, National Center for Cardiovascular Diseases, Chinese Academy of Medical Sciences, Peking Union Medical College</p> <p>Qing, Ping; Fuwai Hospital, National Center for Cardiovascular Diseases, Chinese Academy of Medical Sciences, Peking Union Medical College, Division of Dyslipidemia, State Key Laboratory of Cardiovascular Disease</p> <p>Gao, Ying; Fuwai Hospital, National Center for Cardiovascular Diseases, Chinese Academy of Medical Sciences, Peking Union Medical College</p> <p>Cui, Chuan-Jue; Fuwai Hospital, National Center for Cardiovascular Diseases, Chinese Academy of Medical Sciences, Peking Union Medical College, Division of Dyslipidemia, State Key Laboratory of Cardiovascular Disease</p> <p>Dong, Qian; Fuwai Hospital, National Center for Cardiovascular Diseases, Chinese Academy of Medical Sciences, Peking Union Medical College</p> |

|                                 |                                                                                                                                                                                                                                                                                                                                                                                                                                                |
|---------------------------------|------------------------------------------------------------------------------------------------------------------------------------------------------------------------------------------------------------------------------------------------------------------------------------------------------------------------------------------------------------------------------------------------------------------------------------------------|
|                                 | Sun, Jing ; Fuwai Hospital, National Center for Cardiovascular Diseases, Chinese Academy of Medical Sciences, Peking Union Medical College, Division of Dyslipidemia, State Key Laboratory of Cardiovascular Disease<br>Li, Jian-Jun; Division of Dyslipidemia, State Key Laboratory of Cardiovascular Disease, Fuwai Hospital, National Center for Cardiovascular Diseases, Chinese Academy of Medical Sciences, Peking Union Medical College |
| <b>Primary Subject Heading</b>: | Cardiovascular medicine                                                                                                                                                                                                                                                                                                                                                                                                                        |
| Secondary Subject Heading:      | Cardiovascular medicine, Diabetes and endocrinology                                                                                                                                                                                                                                                                                                                                                                                            |
| Keywords:                       | Fibrinogen, type 2 diabetes mellitus, coronary artery disease, outcome                                                                                                                                                                                                                                                                                                                                                                         |
|                                 |                                                                                                                                                                                                                                                                                                                                                                                                                                                |

SCHOLARONE™  
Manuscripts

**BMJ Open****2016-11-5**

**Title:** Serum fibrinogen and cardiovascular events in Chinese type 2 diabetic patients with stable coronary artery disease: a prospective observational study

**Authors:** Sheng-Hua Yang, Ying Du, Yan Zhang, Xiao-Lin Li, Sha Li, Rui-Xia Xu, Cheng-Gang Zhu, Yuan-Lin Guo, Na-Qiong Wu, Ping Qing, Ying Gao, Chuan-Jue Cui, Qian Dong, Jing Sun, Jian-Jun Li<sup>#</sup>

**Address:** Division of Dyslipidemia, State Key Laboratory of Cardiovascular Disease, Fuwai Hospital, National Center for Cardiovascular Diseases, Chinese Academy of Medical Sciences, Peking Union Medical College, BeiLiShi Road 167, Beijing 100037, China

**#Correspondence:** Professor Jian-Jun Li, MD, PhD. Division of Dyslipidemia, State Key Laboratory of Cardiovascular Disease, Fuwai Hospital, National Center for Cardiovascular Diseases, Chinese Academy of Medical Sciences, Peking Union Medical College, Beijing 100037, China.

**Tel:** 86+10+88396077;

**Fax:** 86+10+88396584;

**E-mail:** [lijianjun938@126.com](mailto:lijianjun938@126.com)

**Word count: 2525**

**ABSTRACT**

**Objectives:** The aim of this study was to investigate the association of serum fibrinogen with cardiovascular events (CVE) in Chinese patients with type 2 diabetes mellitus (T2DM) and stable coronary artery disease (CAD).

**Design:** An observational study.

**Setting:** FuWai Hospital in Beijing, China.

**Participants:** A cohort of 1466 T2DM patients with angiographic-proven stable CAD was evaluated.

**Outcome measures:** Baseline serum fibrinogen levels were measured and trisected into “low”, “middle” and “high”. Their association with CVE was explored using Cox proportional hazard models.

**Results:** With 20.2 months (average) follow-up, 44 (3%) were lost to follow-up, and 96 patients developed CVE. Compared with the patients without CVE, the ones who developed CVE had higher levels of fibrinogen. Univariable regression revealed a significant relation of fibrinogen to CVE (hazard ratio [HR] 1.25, 95% confidence interval [CI]: 1.06-1.47,  $P=0.010$ ) per standard deviation increase of fibrinogen at baseline. After adjusting for multiple established cardiovascular disease (CVD) risk factors, the association persisted (HR 1.30, 95% CI: 1.02-1.66,  $P=0.037$ ). Moreover, after adjusting for CVD risk factors, the HRs for middle and high serum fibrinogen concentration, using “low” group as reference, were 1.23 (95% CI: 0.69–2.20) and 2.20 (95% CI: 1.11–3.36,  $P=0.049$ ).

**Conclusions:** We firstly indicated that elevated fibrinogen level was independently associated with increased CVE in Chinese T2DM patients with stable CAD.

**Keywords:** Fibrinogen; type 2 diabetes mellitus; coronary artery disease; outcome

Strengths and limitations of this study

1. We, for the first time, reported that baseline fibrinogen was associated with cardiovascular events (CVEs) in Chinese type 2 diabetic patients with stable coronary artery disease.
2. The number of CVEs was relatively small and the follow-up duration was relatively short, so further study is needed.
3. We just investigated whether the one-time baseline level of fibrinogen was a predictor of short-term outcome in patients with type 2 diabetic patients with stable coronary artery disease.

## INTRODUCTION

Fibrinogen, as a marker of thrombosis and inflammation, is associated with cardiovascular diseases (CVD). It has been demonstrated that elevated fibrinogen level is significantly associated with intima-media thickness and subclinical atherosclerosis.<sup>1-5</sup> Also, previous study revealed that fibrinogen independently predicted future ischemic stroke risk and incident hypertension.<sup>6-8</sup> What's more, fibrinogen has been well established to be a strong and independent cardiovascular risk factor in general population.<sup>8-12</sup> Data suggested that baseline plasma fibrinogen level could predict cardiovascular events (CVE) in general individuals and nondiabetics.<sup>3,9,10,13</sup>

It is worthy of mentioning that individuals with type 2 diabetes mellitus (T2DM) have higher levels of plasma fibrinogen compared with those without T2DM.<sup>8,14</sup> The most common cause for mortality in patients with diabetes mellitus (DM) is coronary artery disease (CAD). Thereby, it is logically hypothesized that hyperfibrinogenemia could contribute to increase CVE in this disease. However, studies on the role of fibrinogen in cardiovascular outcomes in diabetes are both limited and controversial.<sup>6,15-17</sup>

Based on such situation and combined with a fact that no data is currently available so far with regard to the relationship between fibrinogen and CVE in T2DM patients with stable CAD, we, therefore, performed a prospective observational study of the association of baseline plasma fibrinogen and the risk of cardiovascular events in diabetic patients with stable coronary artery disease.

## Patients and Methods

### Study Population

In the present study, consecutive patients hospitalized in our division were screened between April 2011 and July 2015 for the following inclusion criteria: over the age of 18 years, type 2 diabetes mellitus and angiographic-proven stable coronary artery disease. Exclusion criteria were acute coronary syndrome (ACS), in-hospital cardiac death at first admission in our division, unavailable data of baseline fibrinogen concentration, the existence of any infectious or systematic inflammatory diseases, significant hematologic disorders, thyroid dysfunction, severe liver insufficiency (transaminases > ten times upper reference levels) and/or severe renal insufficiency (end-stage renal disease or chronic dialysis treatment) and malignant tumors. According to the inclusion and exclusion criteria, a total of 1466 eligible patients were enrolled (**Figure 1**). The study was performed according to the Declaration of Helsinki, and the hospital ethics review board (Fuwai Hospital & National Center for Cardiovascular Diseases, Beijing, China) approved



1  
2  
3 the protocol. All the subjects gave written informed consent.  
4  
5

### 6 7 **Biochemical Analysis and Baseline Examination**

8  
9 Overnight fasting blood samples were drawn from each patient at admission and centrifuged at  
10 room temperature within 2 hours. As described in our previous studies,<sup>18,19</sup> the plasma levels of  
11 fibrinogen were quantitatively measured by the method of Clauss and a Stagoauto analyzer with  
12 STA Fibrinogen kit (Diagnostic Stago, Taverny, France). Glucose, haemoglobinA1c (HbA1c), uric  
13 acid and lipid profile were determined by standard methods. The concentrations of high-sensitivity  
14 C-reactive protein (hs-CRP) were determined using immunoturbidimetry (Beckmann Assay 360,  
15 Bera, CA, USA).  
16  
17

18  
19 Height and weight were measured, and body mass index (BMI) ( $\text{kg}/\text{m}^2$ ) was calculated.  
20  
21 Diabetes mellitus was defined as a fasting plasma glucose  $\geq 126$  mg/dL (7.0mmol/L) in multiple  
22 determinations, and/or the current use of medication for diabetes. Hypertension was defined as  
23 repeated blood pressure measurements  $\geq 140/90$  mmHg (at least 2 times in different environments)  
24 or currently taking antihypertensive drugs. Stable CAD was defined as typical angina-like chest  
25 pain brought on by exertion and relieved by rest or sublingual nitrates or both, a positive treadmill  
26 exercise test ( $>1$  mm ST-segment depression), and stable obstructive lesion  $>50\%$  in at least 1 of  
27 the 3 major coronary arteries or major branches assessed by at least 2 independent senior  
28 interventional cardiologists who had no knowledge of the patients' clinical characteristics and  
29 biochemical results. Dyslipidemia was considered to be present in patients if they had fasting total  
30 cholesterol (TC)  $\geq 200$  mg/dL or triglyceride (TG)  $\geq 150$  mg/dL.  
31  
32  
33  
34  
35  
36  
37  
38  
39  
40  
41  
42  
43  
44

### 45 **Definition of Events and Follow-up**

46  
47 The primary outcomes were CVE. CVE were defined as the cardiac death, stroke, nonfatal  
48 myocardial infarction (MI), post-discharge revascularization (PCI/CABG) due to clinical  
49 deterioration or unstable angina (UA). The follow-up data collection was performed by the trained  
50 nurses or cardiologists who were blinded to the aim of this study by means of standardized  
51 telephone interviews at 6-month intervals. Follow-up time was calculated as the number of months  
52 from the enrollment till the last traceable hospital outpatient or inpatient record or telephone  
53 interview before March 2016, and was censored on the date of the first CVE. Death of a  
54  
55  
56  
57  
58  
59  
60

1  
2  
3 participant was reported by relatives or the general practitioner who treated the participant. Three  
4  
5 experienced physicians who were blinded to any of the study data independently classified the  
6  
7 events.

### 8 9 **Statistical Analysis**

10  
11 Continuous variables were presented as mean±SD or median (25th, 75th percentiles) and  
12  
13 categorical variables as percentages. Fibrinogen levels were trisected into “low” ( $\leq 2.91$  g/L),  
14  
15 “middle” (2.91-3.51 g/L) and “high” ( $\geq 3.51$  g/L). Comparisons of continuous baseline data  
16  
17 between two or more groups were performed with Student t test and ANOVA, respectively, and  $\chi^2$   
18  
19 test was used to compare categorical data. Kruskal-Wallis H test was used for nonnormal variables.  
20  
21 Test for linear trend (Jonckheere–Terpstra test) was performed by assigning median value for each  
22  
23 tertile and treated as continuous variables.

24  
25 Participants who were lost during follow-up were treated as censored observations and not used  
26  
27 for follow-up analysis. Using the Cox proportional hazards model, hazard ratios (HR) of CVE,  
28  
29 with 95% confidence intervals, were calculated using crude models as well as models adjusted for  
30  
31 potential confounding factors. A  $P < 0.05$  for two sided testing was considered statistically  
32  
33 significant. The statistical analysis was performed with SPSS version 19.0 software (SPSS Inc.,  
34  
35 Chicago, IL).

## 36 37 **RESULTS**

### 38 39 **Baseline Characteristics**

40  
41 The baseline demographic, clinical characteristics, and laboratory findings of the study cohort  
42  
43 classified by outcome status (with cardiovascular events or not) were listed in **Table 1**. Compared  
44  
45 with the patients without CVE, the ones who developed CVE had lower left ventricle ejection  
46  
47 fraction (LVEF) but higher levels of fibrinogen, HbA1c, highly sensitive C-reactive protein and  
48  
49 uric acid. Meanwhile, we found that there is a tendency to higher fasting triglyceride level in CVE  
50  
51 group ( $P=0.054$ ). Additionally, there is no significant difference in age, BMI, gender, status of  
52  
53 hypertension, smoking status and medical history between the patients with or without CVE.

54  
55 **Table 1** Characteristics of the study cohort with and without cardiovascular events of myocardial  
56  
57 infarction, cardiac death, myocardial revascularization and fatal or nonfatal stroke

|  | CVE (n=96) | No CVE (n=1326) | <i>p</i> |
|--|------------|-----------------|----------|
|--|------------|-----------------|----------|

|                                           |                   |                   |                  |
|-------------------------------------------|-------------------|-------------------|------------------|
| Age (years)                               | 58.54 ± 10.65     | 59.29 ± 9.81      | 0.473            |
| Body Mass Index (kg/m <sup>2</sup> )      | 26.32 ± 3.07      | 26.22 ± 3.21      | 0.790            |
| Gender, men, % (n)                        | 70.8 (68)         | 70.7 (938)        | 0.984            |
| Dyslipidemia, % (n)                       | 88.5 (85)         | 80.6 (1068)       | 0.055            |
| Hypertension, % (n)                       | 78.1 (75)         | 72.9 (966)        | 0.265            |
| Current smoking, % (n)                    | 56.3 (54)         | 51.2 (679)        | 0.343            |
| Duration of diabetes (years)              | 10.24 ± 6.66      | 8.64 ± 6.50       | 0.151            |
| Previous PCI, %(n)                        | 22.9 (22)         | 24.0 (318)        | 0.810            |
| Previous CABG, %(n)                       | 1.0 (1)           | 3.4 (45)          | 0.208            |
| Family history of CAD, % (n)              | 17.7 (17)         | 14.8 (195)        | 0.224            |
| Systolic Blood Pressure (mmHg)            | 124.94 ± 14.64    | 127.86 ± 16.41    | 0.117            |
| Diastolic Blood Pressure (mmHg)           | 74.93 ± 9.12      | 77.01 ± 10.17     | 0.071            |
| Left Ventricle Ejection Fraction (%)      | 60.4 ± 10.2       | 63.7 ± 8.0        | <b>&lt;0.001</b> |
| Total Cholesterol (mmol/L)                | 4.10 ± 1.16       | 4.10 ± 1.21       | 0.962            |
| HDL-cholesterol (mmol/L)                  | 0.98 ± 0.28       | 1.03 ± 0.27       | 0.126            |
| LDL-cholesterol (mmol/L)                  | 2.44 ± 0.99       | 2.46 ± 0.96       | 0.827            |
| Triglycerides (mmol/L)                    | 1.79 (1.28, 2.53) | 1.56 (1.18, 2.21) | 0.054            |
| Apo A1 (g/L)                              | 1.36 ± 0.37       | 1.32 ± 0.28       | 0.140            |
| Apo B (g/L)                               | 0.99 ± 0.34       | 0.94 ± 0.33       | 0.113            |
| HbA1c (%)                                 | 7.89 ± 1.54       | 7.50 ± 1.33       | <b>0.007</b>     |
| Glucose (mmol/L)                          | 7.52 ± 2.68       | 7.18 ± 2.28       | 0.155            |
| Highly Sensitive C-reactive Protein, mg/L | 1.83 (1.08, 4.47) | 1.54 (0.77, 3.23) | <b>0.017</b>     |
| Uric acid (umol/L)                        | 368.39 ± 96.44    | 340.26 ± 93.36    | <b>0.005</b>     |
| eGFR (ml/min)                             | 82.03 ± 24.55     | 80.12 ± 25.58     | 0.471            |
| Fibrinogen (g/L)                          | 3.52 ± 0.85       | 3.30 ± 0.8        | <b>0.015</b>     |
| Medication                                |                   |                   |                  |
| Statin, % (n)                             | 69.8 (67)         | 71.9 (953)        | 0.707            |
| Aspirin, % (n)                            | 88.1 (84)         | 86.7 (1149)       | 0.794            |
| Beta-blocker, % (n)                       | 52.4 (50)         | 48.2 (639)        | 0.601            |
| Calcium Channel Blocker                   | 11.5 (11)         | 20.7 (275)        | 0.166            |
| ACEI/ARB                                  | 30.0 (29)         | 26.5 (351)        | 0.521            |
| OADs, % (n)                               | 48.9 (47)         | 54.3 (720)        | 0.296            |
| Insulin, % (n)                            | 27.1 (26)         | 25.8 (342)        | 0.813            |
| OADs+insulin, % (n)                       | 13.5 (13)         | 19.9 (264)        | 0.215            |

Data are presented as mean ± SD, median (25th, 75th percentiles) or % (n). CVE: cardiovascular events; Apo: apolipoprotein; HbA1c: Glycosylated Hemoglobin, TypeA1C; eGFR, estimated glomerular filtration rate; ACEI/ARB: Angiotensin Converting EnzymeInhibitor / Angiotensin IIReceptor Blocker; OADs, oral anti-diabetic drugs.

**Table 2** compared the baseline cardiovascular risk profiles of the study population, divided into “low” (≥2.91 g/L), “middle” (2.91-3.51 g/L) and “high” (≥3.51 g/L) subgroups on the basis of the fibrinogen concentration. The patients with middle and high levels of fibrinogen had higher

percentage of CVE, female, and higher levels of hs-CRP, total cholesterol, LDL-C, HbA1c and fasting glucose compared with the “low” group. No significant difference was found in age, BMI, blood pressure and smoking status.

**Table 2.** Baseline characteristics of the cohort of the diabetic patients with stable CAD according to serum fibrinogen levels at baseline

| Variables                       | Fibrinogen Tertiles (g/L)      |                               |                                 | p                |
|---------------------------------|--------------------------------|-------------------------------|---------------------------------|------------------|
|                                 | Low ( $\leq 2.91$ )<br>(n=476) | Middle (2.91-3.51)<br>(n=476) | High ( $\geq 3.51$ )<br>(n=470) |                  |
| Age (years)                     | 58.65 $\pm$ 9.66               | 59.16 $\pm$ 9.69              | 59.91 $\pm$ 10.22               | 0.142            |
| BMI (kg/m <sup>2</sup> )        | 26.21 $\pm$ 3.08               | 26.18 $\pm$ 2.92              | 26.30 $\pm$ 3.58                | 0.838            |
| Gender, men, % (n)              | 78.4 (373)                     | 68.5 (326)                    | 65.3 (307)                      | <b>&lt;0.001</b> |
| Dyslipidemia, % (n)             | 80.5 (383)                     | 81.1 (385)                    | 81.9 (385)                      | 0.848            |
| Hypertension, % (n)             | 71.4 (340)                     | 72.0 (342)                    | 76.4 (359)                      | 0.170            |
| Current smoking, % (n)          | 53.2 (253)                     | 53.3 (253)                    | 48.3 (227)                      | 0.219            |
| SBP (mmHg)                      | 126.82 $\pm$ 15.45             | 127.57 $\pm$ 17.08            | 127.58 $\pm$ 17.04              | 0.723            |
| DBP (mmHg)                      | 76.60 $\pm$ 10.00              | 77.07 $\pm$ 10.26             | 76.64 $\pm$ 10.15               | 0.731            |
| TC (mmol/L)                     | 3.86 $\pm$ 1.05                | 4.17 $\pm$ 1.17               | 4.27 $\pm$ 1.24                 | <b>&lt;0.001</b> |
| HDL-C (mmol/L)                  | 1.02 $\pm$ 0.25                | 1.03 $\pm$ 0.26               | 1.03 $\pm$ 0.30                 | 0.739            |
| LDL-C (mmol/L)                  | 2.28 $\pm$ 0.89                | 2.52 $\pm$ 0.94               | 2.60 $\pm$ 1.01                 | <b>&lt;0.001</b> |
| Triglycerides (mmol/L)          | 1.57 (1.12, 2.13)              | 1.60 (1.24, 2.34)             | 1.54 (1.19, 2.17)               | 0.092            |
| HbA1C (%)                       | 7.23 $\pm$ 1.23                | 7.52 $\pm$ 1.28               | 7.84 $\pm$ 1.46                 | <b>&lt;0.001</b> |
| Glucose (mmol/L)                | 6.81 $\pm$ 2.10                | 7.22 $\pm$ 3.32               | 7.58 $\pm$ 2.43                 | <b>&lt;0.001</b> |
| Hs-CRP, mg/L                    | 0.88 (0.52, 1.45)              | 1.54 (0.82, 2.71)             | 3.64 (1.83, 8.34)               | <b>&lt;0.001</b> |
| Uric acid (umol/L)              | 340.93 $\pm$ 95.56             | 339.06 $\pm$ 86.97            | 346.60 $\pm$ 98.62              | 0.441            |
| CVD events, % (n)               | 5.0 (24)                       | 5.7 (27)                      | 9.6 (45)                        | <b>0.011</b>     |
| Duration of diabetes<br>(years) | 9.03 $\pm$ 6.82                | 8.89 $\pm$ 6.03               | 10.83 $\pm$ 6.83                | 0.356            |
| Gensini score                   | 28 (19, 49)                    | 30 (16, 56)                   | 33 (17, 61)                     | 0.315            |
| Fibrinogen (g/L)                | 2.55 $\pm$ 0.31                | 3.21 $\pm$ 0.16               | 4.20 $\pm$ 0.74                 | <b>&lt;0.001</b> |

Data are presented as mean  $\pm$  SD, median (25<sup>th</sup>, 75<sup>th</sup> percentiles) or % (n). CAD, coronary artery disease; BMI, body mass index; SBP, systolic blood pressure; DBP, diastolic blood pressure; TC, total cholesterol; hs-CRP, high-sensitivity C-reactive protein; CVD events: myocardial infarction, cardiac death, myocardial revascularization and fatal or nonfatal stroke.

## Outcomes

The average follow-up time was 20.2 months (range from 0.4 to 49.3). During the follow-up period, 96 patients experienced cardiovascular event: 19 (19.8%) nonfatal myocardial infarctions (MIs), 55 (57.3%) myocardial revascularization procedures (PCI or CABG) because of clinical deterioration, 15 (15.6%) strokes and 7 (7.3%) cardiac deaths. We calculated the number of new

events per 100 person years, namely, 2.0047/100 per 100 person years. Patients suffered ACS and underwent revascularization procedures were assigned once in the analysis. Of the 1466 diabetic patients with stable coronary artery disease, 44 (3%) were lost to follow-up. Therefore, the data of 1422 participants were used for follow-up analysis.

### Hazard Ratios of Fibrinogen for Study Outcomes

Univariable regression revealed significant association between serum fibrinogen level at baseline and CVE (HR=1.25, 95% confidence interval [CI]: 1.06-1.47,  $P=0.010$ ) per standard deviation (SD) increase of serum fibrinogen at baseline. After adjusting for multiple established CVD risk factors, the association persisted (HR=1.30, 95% CI: 1.02-1.66,  $P=0.037$ ) (Table 3). Unadjusted HR for developing a CVE was significantly increased in the “high” group compared with the “low” group at baseline, and similar results were also found after adjusting for sex and age (Figure 2). After adjusting for established CVD risk factors, the HR for middle and high serum fibrinogen concentration, using “low” group as reference, were 1.23 (95% CI: 0.69–2.20) and 2.20 (95% CI: 1.11–3.36) ( $P$  for trend 0.049) (Table 3).

**Table 3** Hazard Ratios for Cardiovascular Disease Events Association with the Plasma Levels of Fibrinogen (low, middle and high)

|         | 1 SD fibrinogen increase |                   |                   | $p$           |
|---------|--------------------------|-------------------|-------------------|---------------|
| Crude   | 1.25 (1.06, 1.48)        |                   |                   | 0.010         |
| Model 1 | 1.26 (1.06, 1.49)        |                   |                   | 0.008         |
| Model 2 | 1.25 (1.05, 1.49)        |                   |                   | 0.013         |
| Model 3 | 1.36 (1.07, 1.72)        |                   |                   | 0.011         |
| Model 4 | 1.34 (1.05, 1.71)        |                   |                   | 0.017         |
| Model 5 | 1.30 (1.02, 1.66)        |                   |                   | 0.037         |
|         | Hazard Ratio (95% CI)    |                   |                   | $p$ for trend |
| Model   | Low<br>(Reference)       | Middle            | High              |               |
| Crude   | 1.00                     | 1.10 (0.64, 1.91) | 1.99 (1.21, 3.26) | 0.008         |
| Model 1 | 1.00                     | 1.10 (0.64, 1.92) | 2.00 (1.22, 3.30) | 0.007         |
| Model 2 | 1.00                     | 1.09 (0.63, 1.89) | 1.97 (1.19, 3.26) | 0.009         |
| Model 3 | 1.00                     | 1.14 (0.65, 2.00) | 2.15 (1.22, 3.80) | 0.012         |
| Model 4 | 1.00                     | 1.23 (0.69, 2.19) | 2.10 (1.16, 3.80) | 0.031         |
| Model 5 | 1.00                     | 1.23 (0.69, 2.20) | 2.02 (1.11, 3.68) | 0.049         |

Model 1: adjusted for sex, and age; Model 2: Model 1+ total cholesterol, high-density lipoprotein cholesterol, low-density lipoprotein cholesterol, hypertension, and smoking; Model 3: Model 2+

1  
2  
3 triglycerides, hs-CRP, and HbA1c; Model 4: Model 3+uric acid, body mass index, and family  
4 history of CVD, and Model 5: Model 4+Left Ventricle Ejection Fraction. CVD, cardiovascular  
5 disease; SD, standard deviation  
6  
7

## 8 9 **DISCUSSION**

10  
11 In this prospective observational study in single center with a relative large sample size, we, for the  
12 first time, found that baseline fibrinogen concentration was independently associated with CVE in  
13 Chinese type 2 diabetic patients with stable CAD. Although the study might be limited by  
14 follow-up duration, the present data provided novel and important information with regard to the  
15 key issue whether the baseline fibrinogen concentration can be a marker for predicting the clinical  
16 outcomes in T2DM patients with stable CAD.  
17  
18  
19  
20  
21

22 Sufficient evidence has demonstrated that plasma fibrinogen is a risk factor for cardiovascular  
23 disease in general population,<sup>3,6,8-10</sup> but the role of fibrinogen in diabetes remains controversial.  
24 Some previous studies demonstrated that hyperfibrinogenemia was an important risk factor for  
25 vascular complications in diabetes.<sup>20</sup> For instance, a prospective cohort of 2329 patients with type  
26 1 diabetes revealed that fibrinogen was significant and independent predictor of coronary heart  
27 disease in men.<sup>15</sup> Moreover, increased fibrinogen level was shown to be associated with diabetic  
28 nephropathy in type 2 diabetics<sup>21,22</sup> and in type 1 diabetics.<sup>15,23,24</sup> Gargano Heart Study (GHS)  
29 showed that fibrinogen was a predictor of incident major CVE after adjusting for sex, age,  
30 smoking habit and BMI status in diabetics.<sup>25</sup> In parallel, Bruno et al reported that fibrinogen had  
31 an independent predictive effect on cardiovascular mortality in T2DM.<sup>26</sup> Furthermore, Stehouwer  
32 et al. revealed that baseline fibrinogen concentrations were strongly and independently associated  
33 with risk of all-cause death in type 2 diabetics.<sup>27</sup> On the contrary, some studies reported that the  
34 association between fibrinogen and incident CAD in patients with T2DM was non-significant via  
35 multivariable analyses.<sup>17,28</sup> As we well known, the major cause of death in T2DM is  
36 macrovascular complications, especially CAD. Hence, in the present study, we enrolled  
37 angiographic-proven CAD patients with T2DM and tried to examine the role of fibrinogen in such  
38 a study population of type 2 diabetic patients with CAD. We found that elevated fibrinogen level  
39 at baseline was associated with increased CVE in T2DM patients with stable CAD. Additionally,  
40 we also found that fibrinogen was higher among those patients who developed a cardiovascular  
41 event compared with those who did not, which is in agreement with previous studies.<sup>9,13</sup> To our  
42  
43  
44  
45  
46  
47  
48  
49  
50  
51  
52  
53  
54  
55  
56  
57  
58  
59  
60

1  
2  
3 knowledge, this is the first time to investigate the relationship between fibrinogen and CVE in  
4  
5 T2DM patients with stable CAD.  
6

7  
8 Recently the ADVANCE study (Action in Diabetes and Vascular Disease: Preterax and  
9  
10 Diamicron Modified Release Controlled Evaluation) reported that baseline fibrinogen level was  
11  
12 associated with an increased risk of macrovascular events and death in univariate analysis, but  
13  
14 after further adjustment, fibrinogen was not an independent predictor of macrovascular.<sup>17</sup> In the  
15  
16 present study, our finding is not consistent with the ADVANCE study, and we speculate that some  
17  
18 reasons could explain it. Firstly, the inclusive criteria are different: we chose the patients with  
19  
20 T2DM and stable CAD, while the ADVANCE study chose the subjects with T2DM and a history  
21  
22 of CVD (stroke, myocardial infarction, transient ischemic attack, unstable angina, coronary or  
23  
24 peripheral revascularization, amputation, macroalbuminuria, proliferative retinopathy or  
25  
26 photocoagulation, macular edema, or blindness in one eye) or one or more additional  
27  
28 cardiovascular risk factors. Secondly, despite the patients from many countries in the ADVANCE  
29  
30 study, Chinese and Indians were excluded. Actually, there are ethnic differences in fibrinogen  
31  
32 levels.<sup>29-32</sup> Thus, whether the results also persist in Chinese is undetermined. Finally, the  
33  
34 definitions of outcomes are different. In ADVANCE study, major macrovascular events were  
35  
36 cardiovascular death, nonfatal myocardial infarction, or nonfatal stroke, while our cardiovascular  
37  
38 events were defined as cardiac death, stroke, nonfatal myocardial infarction (MI), post-discharge  
39  
40 revascularization (PCI/CABG) due to clinical deterioration or unstable angina (UA). Additionally,  
41  
42 our previous cross-sectional study has revealed that plasma fibrinogen is associated with severity  
43  
44 of coronary artery disease evaluated using Gensini score in diabetic patients,<sup>19</sup> which partly  
45  
46 supports our present finding. Furthermore, in the present study, we found that 3.515(g/L) is a  
47  
48 cut-off value of fibrinogen to predict CVEs in our cohort, which is consistent with previous  
49  
50 study.<sup>33</sup>  
51

52  
53 There were several limitations of the present study. Firstly, the number of events is relatively  
54  
55 small to assess the prognostic value of fibrinogen. The conclusion needs to be testified by  
56  
57 large-scale study in the future. Secondly, the follow-up duration was relatively short and longer  
58  
59 follow-up will be required. Thirdly, this sample population was collected prospectively from a  
60  
single center in China. Fibrinogen varies in race,<sup>29</sup> so we do not know if our results would apply to  
other ethnic groups and studies from multiple centers are needed to test our finding. Finally, we



1  
2  
3 just collected one-time baseline level of fibrinogen.  
4

5 In conclusion, we found that fibrinogen was associated with cardiovascular events in patients  
6 with type 2 diabetes with stable CAD in Chinese population. Further studies are required to clarify  
7 the issue completely.  
8  
9

10 **Contributors** S-H Y analyzed the data and drafted the manuscript. J-J L planned, designed the  
11 study, participated in fundraising and corrected the final version. YD, YZ, X-L L and SL  
12 participated in collecting data and interpreted the results. R-X X, C-G Z, Y-L G and N-Q W  
13 participated in the study design, interpretation of the results and manuscript review. PQ, YG, C-J  
14 C and QD participated in collecting data and reviewing manuscript. All authors read and have  
15 approved the final manuscript.  
16  
17  
18  
19  
20  
21  
22  
23  
24

25 **Funding** This work was partially supported by the National Natural Science Foundation of China  
26 (81070171, 81241121), the Specialized Research Fund for the Doctoral Program of Higher  
27 Education of China (20111106110013), the Capital Special Foundation of Clinical Application  
28 Research (Z121107001012015), the Capital Health Development Fund (2011400302), and the  
29 Beijing Natural Science Foundation (7131014) awarded to Dr. Jian-Jun Li, MD, PhD.  
30  
31  
32  
33  
34

35 **Competing interests** The authors declare that they have no completing interests.  
36  
37

38 **Patient consent** Obtained.  
39  
40

41 **Ethics approval** The study was performed according to the Declaration of Helsinki, and the  
42 hospital ethics review board (Fuwai Hospital & National Center for Cardiovascular Diseases,  
43 Beijing, China) approved the protocol.  
44  
45  
46  
47

48 **Data sharing statement** The technical appendix, statistical code and data set are available from  
49 the corresponding author.  
50  
51  
52  
53  
54

## 55 REFERENCES

- 56  
57 1. Sabeti S, Exner M, Mlekusch W, *et al.* Prognostic impact of fibrinogen in carotid  
58  
59  
60



- 1  
2  
3 atherosclerosis: nonspecific indicator of inflammation or independent predictor of disease  
4 progression? *Stroke* 2005;36:1400-4.
- 5  
6 2. Green D, Foiles N, Chan C, *et al.* Elevated fibrinogen levels and subsequent subclinical  
7 atherosclerosis: the CARDIA Study. *Atherosclerosis* 2009;202:623-31.
- 8  
9 3. De Luca G, Verdoia M, Cassetti E, *et al.* High fibrinogen level is an independent predictor of  
10 presence and extent of coronary artery disease among Italian population. *J Thromb*  
11 *Thrombolysis* 2011;31:458-63.
- 12  
13 4. Temelkova-Kurktschiev T, Koehler C, Henkel E, *et al.* Leukocyte count and fibrinogen are  
14 associated with carotid and femoral intima-media thickness in a risk population for diabetes.  
15 *Cardiovasc Res* 2002;56:277-83.
- 16  
17 5. Willeit P, Thompson SG, Agewall S, *et al.* Inflammatory markers and extent and progression of  
18 early atherosclerosis: Meta-analysis of individual-participant-data from 20 prospective  
19 studies of the PROG-IMT collaboration. *Eur J Prev Cardiol* 2016;23:194-205.
- 20  
21 6. Chuang SY, Bai CH, Chen WH, *et al.* Fibrinogen Independently Predicts the Development of  
22 Ischemic Stroke in a Taiwanese Population: CVDFACTS Study. *Stroke* 2009;40:1578-84.
- 23  
24 7. Shankar A, Wang JJ, Rohtchina E, *et al.* Positive association between plasma fibrinogen level  
25 and incident hypertension among men: population-based cohort study. *Hypertension*  
26 2006;48:1043-9.
- 27  
28 8. Danesh J, Lewington S, Thompson SG, *et al.* Plasma fibrinogen level and the risk of major  
29 cardiovascular diseases and nonvascular mortality: an individual participant meta-analysis.  
30 *JAMA*2005;294:1799-809.
- 31  
32 9. Sinning JM, Bickel C, Messow CM, *et al.* Impact of C-reactive protein and fibrinogen on  
33 cardiovascular prognosis in patients with stable angina pectoris: the AtheroGene study. *Eur*  
34 *Heart J* 2006;27:2962-8.
- 35  
36 10. Collaboration TERF. C-Reactive Protein, Fibrinogen, and Cardiovascular Disease Prediction. *N*  
37 *Engl J Med*2012;367:1310-20.
- 38  
39 11. Park CS, Ihm S-H, Yoo K-D, *et al.* Relation Between C-Reactive Protein, Homocysteine Levels,  
40 Fibrinogen, and Lipoprotein Levels and Leukocyte and Platelet Counts, and 10-Year Risk for  
41 Cardiovascular Disease Among Healthy Adults in the USA. *Am J Cardio*2010;105:1284-88.
- 42  
43 12. Danesh J, Collins R, Appleby P, *et al.* Association of fibrinogen, C-reactive protein, albumin, or  
44 leukocyte count with coronary heart disease: meta-analyses of prospective studies.  
45 *JAMA*1998;279:1477-82.
- 46  
47 13. Luc G. C-Reactive Protein, Interleukin-6, and Fibrinogen as Predictors of Coronary Heart  
48 Disease: The PRIME Study. *Arterioscler Thromb Vasc Biol*2003;23:1255-61.
- 49  
50 14. Barazzoni R, Zanetti M, Davanzo G, *et al.* Increased fibrinogen production in type 2 diabetic  
51 patients without detectable vascular complications: correlation with plasma glucagon  
52 concentrations. *J Clin Endocrinol Metab* 2000;85:3121-5.
- 53  
54 15. Soedamah-Muthu SS, Chaturvedi N, Pickup JC, *et al.* Relationship between plasma sialic acid  
55 and fibrinogen concentration and incident micro- and macrovascular complications in type 1  
56 diabetes. The EURODIAB Prospective Complications Study (PCS). *Diabetologia*  
57 2008;51:493-501.
- 58  
59 16. Engstrom G, Stavenow L, Hedblad B, *et al.* Inflammation-sensitive plasma proteins, diabetes,  
60 and mortality and incidence of myocardial infarction and stroke: a population-based study.  
*Diabetes* 2003;52:442-7.

17. Lowe G, Woodward M, Hillis G, *et al.* Circulating inflammatory markers and the risk of vascular complications and mortality in people with type 2 diabetes and cardiovascular disease or risk factors: the ADVANCE study. *Diabetes* 2014;63:1115-23.
18. Zhang Y, Zhu C-G, Xu R-X, *et al.* Relation of circulating PCSK9 concentration to fibrinogen in patients with stable coronary artery disease. *J Clin Lipidol* 2014;8:494-500.
19. Hong L-F, Li X-L, Luo S-H, *et al.* Association of Fibrinogen with Severity of Stable Coronary Artery Disease in Patients with Type 2 Diabetic Mellitus. *Dis Markers* 2014;2014:1-8.
20. Ganda OP, Arkin CF. Hyperfibrinogenemia. An important risk factor for vascular complications in diabetes. *Diabetes Care* 1992;15:1245-50.
21. Tessari P, Kiwanuka E, Barazzoni R, *et al.* Diabetic nephropathy is associated with increased albumin and fibrinogen production in patients with type 2 diabetes. *Diabetologia* 2006;49:1955-61.
22. Azad N, Agrawal L, Emanuele NV, *et al.* Association of PAI-1 and fibrinogen with diabetic retinopathy in the Veterans Affairs Diabetes Trial (VADT). *Diabetes Care* 2014;37:501-6.
23. Klein RL, Hunter SJ, Jenkins AJ, *et al.* Fibrinogen is a marker for nephropathy and peripheral vascular disease in type 1 diabetes: studies of plasma fibrinogen and fibrinogen gene polymorphism in the DCCT/EDIC cohort. *Diabetes Care* 2003;26:1439-48.
24. Polat SB, Ugurlu N, Yulek F, *et al.* Evaluation of serum fibrinogen, plasminogen, alpha2-anti-plasmin, and plasminogen activator inhibitor levels (PAI) and their correlation with presence of retinopathy in patients with type 1 DM. *J Diabetes Res* 2014;2014:317292.
25. Pacilli A, De Cosmo S, Trischitta V, *et al.* Role of relationship between HbA1c, fibrinogen and HDL-cholesterol on cardiovascular disease in patients with type 2 diabetes mellitus. *Atherosclerosis* 2013;228:247-8.
26. Bruno G, Merletti F, Biggeri A, *et al.* Fibrinogen and AER are major independent predictors of 11-year cardiovascular mortality in type 2 diabetes: the Casale Monferrato Study. *Diabetologia* 2005;48:427-34.
27. Stehouwer CD, Gall MA, Twisk JW, *et al.* Increased urinary albumin excretion, endothelial dysfunction, and chronic low-grade inflammation in type 2 diabetes: progressive, interrelated, and independently associated with risk of death. *Diabetes* 2002;51:1157-65.
28. Saito I, Folsom AR, Brancati FL, *et al.* Nontraditional risk factors for coronary heart disease incidence among persons with diabetes: the Atherosclerosis Risk in Communities (ARIC) Study. *Ann Intern Med* 2000;133:81-91.
29. Cook DG, Cappuccio FP, Atkinson RW, *et al.* Ethnic differences in fibrinogen levels: the role of environmental factors and the beta-fibrinogen gene. *Am J Epidemiol* 2001;153:799-806.
30. Albert MA. Inflammatory biomarkers, race/ethnicity and cardiovascular disease. *Nutr Rev* 2007;65:S234-8.
31. Albert MA, Glynn RJ, Buring JE, *et al.* Relation between soluble intercellular adhesion molecule-1, homocysteine, and fibrinogen levels and race/ethnicity in women without cardiovascular disease. *Am J Cardiol* 2007;99:1246-51.
32. Albert MA, Pare G, Morris A, *et al.* Candidate genetic variants in the fibrinogen, methylenetetrahydrofolate reductase, and intercellular adhesion molecule-1 genes and plasma levels of fibrinogen, homocysteine, and intercellular adhesion molecule-1 among various race/ethnic groups: data from the Women's Genome Health Study. *Am Heart J* 2009;157:777-83.e1.

- 1  
2  
3 33. Zhang Y, Zhu CG, Guo YL, *et al.* Higher fibrinogen level is independently linked with the  
4 presence and severity of new-onset coronary atherosclerosis among Han Chinese population.  
5 *PLoS One* 2014;9:e113460.  
6  
7  
8  
9  
10  
11

## 12 **Figure legends**

13  
14  
15 Figure 1 Flow chart of the study. CAD, coronary artery disease.

16 Figure 2 Unadjusted (A) and adjusted by sex and age (B) cumulative hazard of cardiovascular  
17 events based on the levels of fibrinogen (low, middle and high).  
18  
19  
20  
21  
22  
23  
24  
25  
26  
27  
28  
29  
30  
31  
32  
33  
34  
35  
36  
37  
38  
39  
40  
41  
42  
43  
44  
45  
46  
47  
48  
49  
50  
51  
52  
53  
54  
55  
56  
57  
58  
59  
60

1  
2  
3  
4  
5  
6  
7  
8  
9  
10  
11  
12  
13  
14  
15  
16  
17  
18  
19  
20  
21  
22  
23  
24  
25  
26  
27  
28  
29  
30  
31  
32  
33  
34  
35  
36  
37  
38  
39  
40  
41  
42  
43  
44  
45  
46  
47  
48  
49  
50  
51  
52  
53  
54  
55  
56  
57  
58  
59  
60



Figure 1 Flow chart of the study. CAD, coronary artery disease.

63x47mm (600 x 600 DPI)

ew only

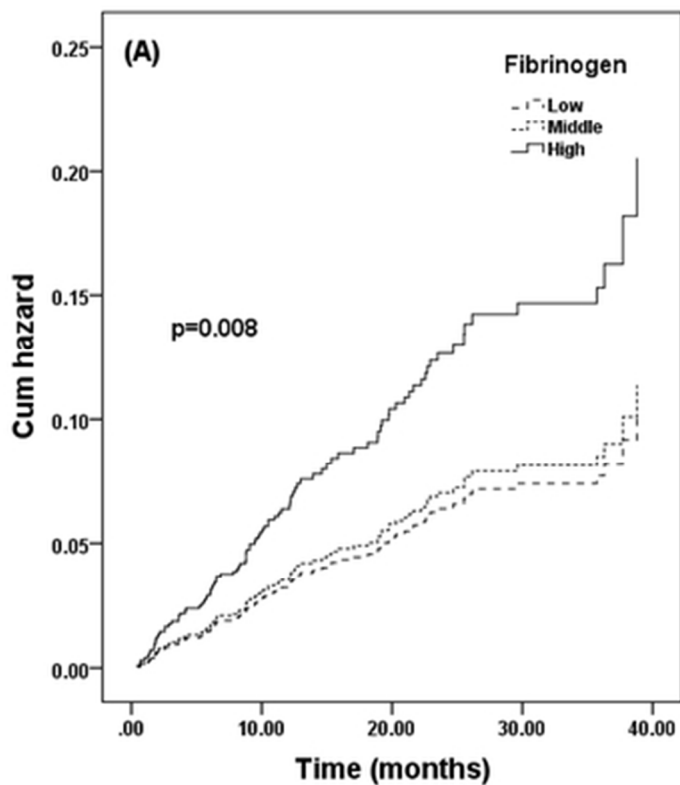

Figure 2 Unadjusted (A) and adjusted by sex and age (B) cumulative hazard of cardiovascular events based on the levels of fibrinogen (low, middle and high).

39x33mm (300 x 300 DPI)

only

1  
2  
3  
4  
5  
6  
7  
8  
9  
10  
11  
12  
13  
14  
15  
16  
17  
18  
19  
20  
21  
22  
23  
24  
25  
26  
27  
28  
29  
30  
31  
32  
33  
34  
35  
36  
37  
38  
39  
40  
41  
42  
43  
44  
45  
46  
47  
48  
49  
50  
51  
52  
53  
54  
55  
56  
57  
58  
59  
60

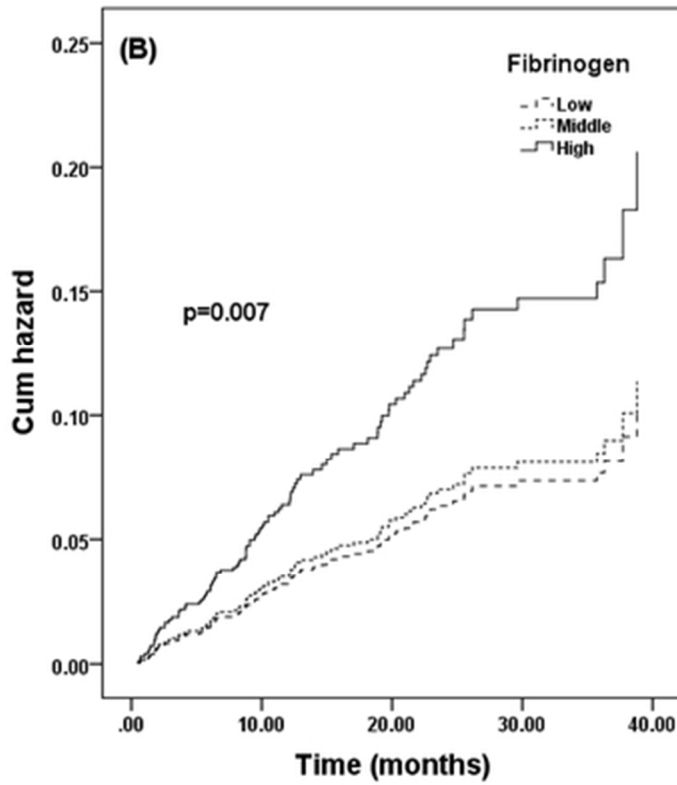

Figure 2 Unadjusted (A) and adjusted by sex and age (B) cumulative hazard of cardiovascular events based on the levels of fibrinogen (low, middle and high).

39x33mm (300 x 300 DPI)

only

## STROBE Statement—checklist of items that should be included in reports of observational studies

|                              | Item No | Recommendation                                                                                                                                                                                                                                                                                                                                                                                                                                                         | Page number |
|------------------------------|---------|------------------------------------------------------------------------------------------------------------------------------------------------------------------------------------------------------------------------------------------------------------------------------------------------------------------------------------------------------------------------------------------------------------------------------------------------------------------------|-------------|
| <b>Title and abstract</b>    | 1       | (a) Indicate the study's design with a commonly used term in the title or the abstract                                                                                                                                                                                                                                                                                                                                                                                 | 1           |
|                              |         | (b) Provide in the abstract an informative and balanced summary of what was done and what was found                                                                                                                                                                                                                                                                                                                                                                    | 2           |
| <b>Introduction</b>          |         |                                                                                                                                                                                                                                                                                                                                                                                                                                                                        |             |
| Background/rationale         | 2       | Explain the scientific background and rationale for the investigation being reported                                                                                                                                                                                                                                                                                                                                                                                   | 3           |
| Objectives                   | 3       | State specific objectives, including any prespecified hypotheses                                                                                                                                                                                                                                                                                                                                                                                                       | 3           |
| <b>Methods</b>               |         |                                                                                                                                                                                                                                                                                                                                                                                                                                                                        |             |
| Study design                 | 4       | Present key elements of study design early in the paper                                                                                                                                                                                                                                                                                                                                                                                                                | 3           |
| Setting                      | 5       | Describe the setting, locations, and relevant dates, including periods of recruitment, exposure, follow-up, and data collection                                                                                                                                                                                                                                                                                                                                        | 3,4         |
| Participants                 | 6       | (a) <i>Cohort study</i> —Give the eligibility criteria, and the sources and methods of selection of participants. Describe methods of follow-up<br><i>Case-control study</i> —Give the eligibility criteria, and the sources and methods of case ascertainment and control selection. Give the rationale for the choice of cases and controls<br><i>Cross-sectional study</i> —Give the eligibility criteria, and the sources and methods of selection of participants | 3           |
|                              |         | (b) <i>Cohort study</i> —For matched studies, give matching criteria and number of exposed and unexposed<br><i>Case-control study</i> —For matched studies, give matching criteria and the number of controls per case                                                                                                                                                                                                                                                 | 3           |
| Variables                    | 7       | Clearly define all outcomes, exposures, predictors, potential confounders, and effect modifiers. Give diagnostic criteria, if applicable                                                                                                                                                                                                                                                                                                                               | 4           |
| Data sources/<br>measurement | 8*      | For each variable of interest, give sources of data and details of methods of assessment (measurement). Describe comparability of assessment methods if there is more than one group                                                                                                                                                                                                                                                                                   | 4           |
| Bias                         | 9       | Describe any efforts to address potential sources of bias                                                                                                                                                                                                                                                                                                                                                                                                              |             |
| Study size                   | 10      | Explain how the study size was arrived at                                                                                                                                                                                                                                                                                                                                                                                                                              | 3, 5        |
| Quantitative variables       | 11      | Explain how quantitative variables were handled in the analyses. If applicable, describe which groupings were chosen and why                                                                                                                                                                                                                                                                                                                                           | 5           |
| Statistical methods          | 12      | (a) Describe all statistical methods, including those used to control for confounding                                                                                                                                                                                                                                                                                                                                                                                  | 5           |
|                              |         | (b) Describe any methods used to examine subgroups and interactions                                                                                                                                                                                                                                                                                                                                                                                                    | 5           |
|                              |         | (c) Explain how missing data were addressed                                                                                                                                                                                                                                                                                                                                                                                                                            | 4           |
|                              |         | (d) <i>Cohort study</i> —If applicable, explain how loss to follow-up was addressed<br><i>Case-control study</i> —If applicable, explain how matching of cases and controls was addressed<br><i>Cross-sectional study</i> —If applicable, describe analytical methods taking account of sampling strategy                                                                                                                                                              | 4           |
|                              |         | (e) Describe any sensitivity analyses                                                                                                                                                                                                                                                                                                                                                                                                                                  | 4           |

Continued on next page

| <b>Results</b>           |     |                                                                                                                                                                                                                                                                                                                                                                                                               |                   |
|--------------------------|-----|---------------------------------------------------------------------------------------------------------------------------------------------------------------------------------------------------------------------------------------------------------------------------------------------------------------------------------------------------------------------------------------------------------------|-------------------|
| Participants             | 13* | (a) Report numbers of individuals at each stage of study—eg numbers potentially eligible, examined for eligibility, confirmed eligible, included in the study, completing follow-up, and analysed<br>(b) Give reasons for non-participation at each stage<br>(c) Consider use of a flow diagram                                                                                                               | 4                 |
| Descriptive data         | 14* | (a) Give characteristics of study participants (eg demographic, clinical, social) and information on exposures and potential confounders<br>(b) Indicate number of participants with missing data for each variable of interest<br>(c) <i>Cohort study</i> —Summarise follow-up time (eg, average and total amount)                                                                                           | 7                 |
| Outcome data             | 15* | <i>Cohort study</i> —Report numbers of outcome events or summary measures over time<br><i>Case-control study</i> —Report numbers in each exposure category, or summary measures of exposure<br><i>Cross-sectional study</i> —Report numbers of outcome events or summary measures                                                                                                                             | 7                 |
| Main results             | 16  | (a) Give unadjusted estimates and, if applicable, confounder-adjusted estimates and their precision (eg, 95% confidence interval). Make clear which confounders were adjusted for and why they were included<br>(b) Report category boundaries when continuous variables were categorized<br>(c) If relevant, consider translating estimates of relative risk into absolute risk for a meaningful time period | 6-8<br>6-8<br>6-8 |
| Other analyses           | 17  | Report other analyses done—eg analyses of subgroups and interactions, and sensitivity analyses                                                                                                                                                                                                                                                                                                                | 7,8               |
| <b>Discussion</b>        |     |                                                                                                                                                                                                                                                                                                                                                                                                               |                   |
| Key results              | 18  | Summarise key results with reference to study objectives                                                                                                                                                                                                                                                                                                                                                      | 8,9               |
| Limitations              | 19  | Discuss limitations of the study, taking into account sources of potential bias or imprecision. Discuss both direction and magnitude of any potential bias                                                                                                                                                                                                                                                    | 10                |
| Interpretation           | 20  | Give a cautious overall interpretation of results considering objectives, limitations, multiplicity of analyses, results from similar studies, and other relevant evidence                                                                                                                                                                                                                                    | 9,10              |
| Generalisability         | 21  | Discuss the generalisability (external validity) of the study results                                                                                                                                                                                                                                                                                                                                         | 10                |
| <b>Other information</b> |     |                                                                                                                                                                                                                                                                                                                                                                                                               |                   |
| Funding                  | 22  | Give the source of funding and the role of the funders for the present study and, if applicable, for the original study on which the present article is based                                                                                                                                                                                                                                                 | 10,11             |

\*Give information separately for cases and controls in case-control studies and, if applicable, for exposed and unexposed groups in cohort and cross-sectional studies.

**Note:** An Explanation and Elaboration article discusses each checklist item and gives methodological background and published examples of transparent reporting. The STROBE checklist is best used in conjunction with this article (freely available on the Web sites of PLoS Medicine at <http://www.plosmedicine.org/>, Annals of Internal Medicine at <http://www.annals.org/>, and Epidemiology at <http://www.epidem.com/>). Information on the STROBE Initiative is available at [www.strobe-statement.org](http://www.strobe-statement.org).
